# Supplementary material for: Impairment of the ER/mitochondria compartment in human cardiomyocytes with PLN p.Arg14del mutation
Source: PubMed Central journal article supplement (PMC8185541; doi:10.15252/emmm.202013074), 2021-05-16

Manuscript Figure 6G

DNPH-carboxylation/cMyBP-C

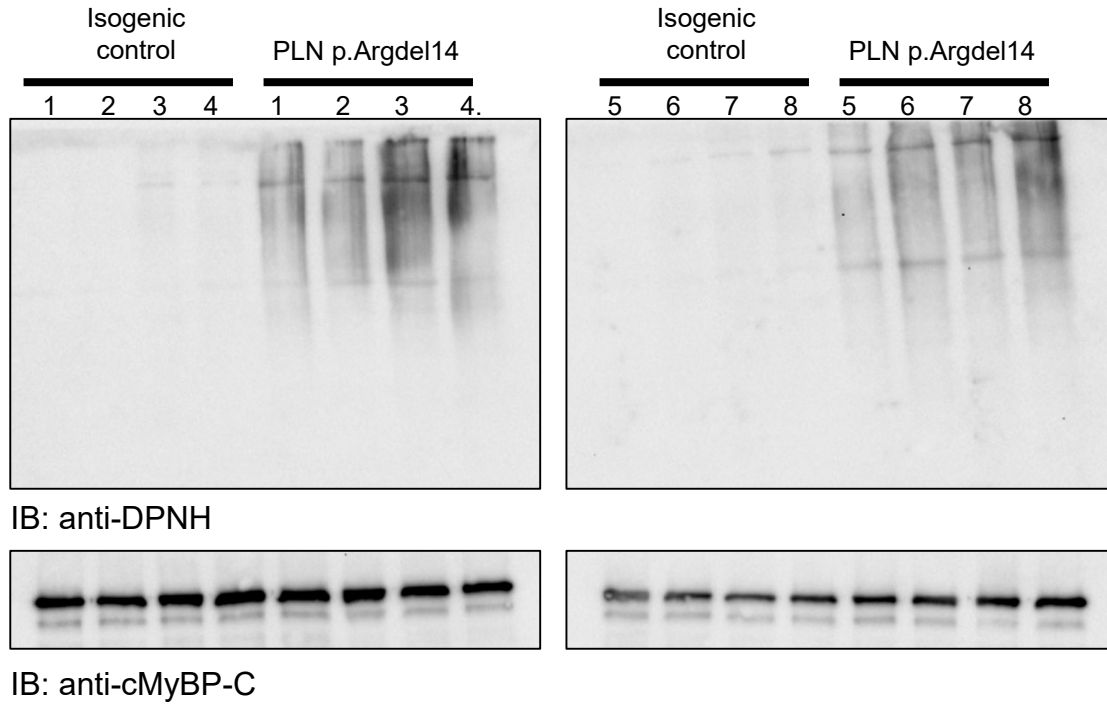

Uncropped Figure 6G

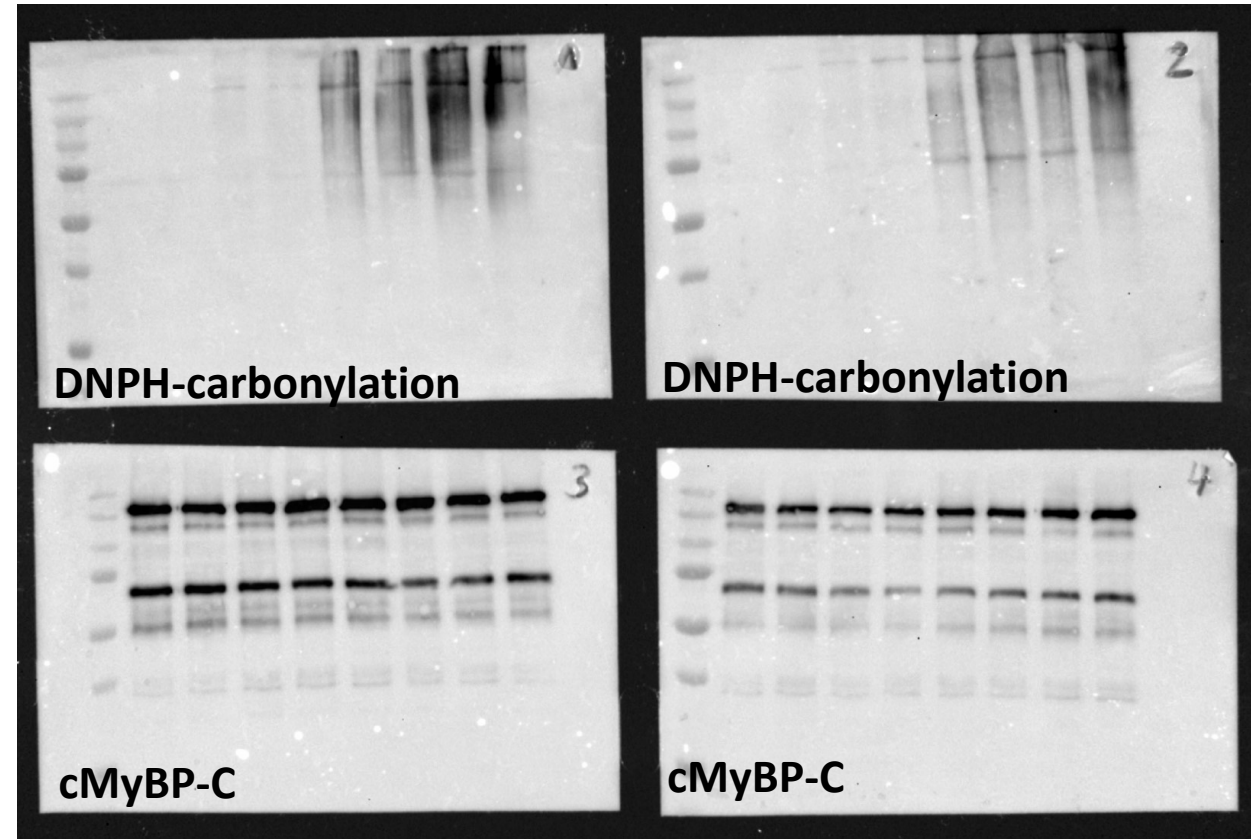

Supplement: EMMM-13-e13074-s002.pdf [file EMMM-13-e13074-s002.pdf]
