# Supplementary material for: Impairment of the ER/mitochondria compartment in human cardiomyocytes with PLN p.Arg14del mutation
Source: PubMed Central journal article supplement (PMC8185541; doi:10.15252/emmm.202013074), 2021-05-16
Supplement: EMMM-13-e13074-s003.pdf [file EMMM-13-e13074-s003.pdf]

## Expanded View Figures

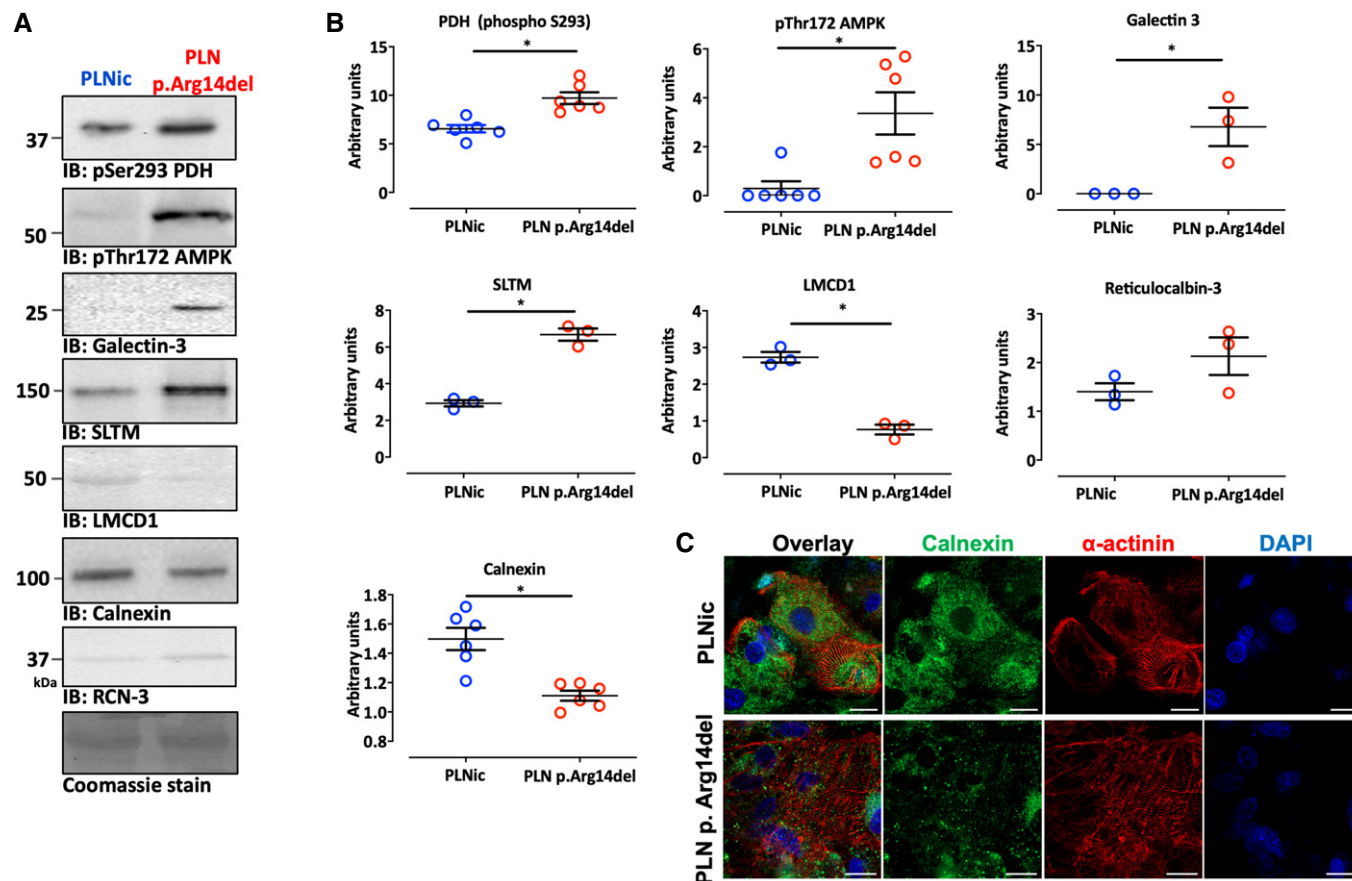

**Figure EV1. Investigation of protein expression and localization.**

A, B Western immunoblots for phosphorylated pyruvate dehydrogenase at pS293 (PDH;  $n = 6$ , each replicate consists of a pool of 3–4 EHTs from 2 different separate batches), AMP-dependent protein kinase at Thr172 (AMPK;  $n = 6$ , each replicate consists of a pool of 3–4 EHTs from 2 different separate batches), galectin-3 ( $n = 3$ ; each replicate consists of a pool of 3–4 EHTs from 2 different separate batches), SAFB-like transcription modulator (SLTM;  $n = 3$ ; each replicate consists of a pool of 3–4 EHTs from 2 different separate batches), LIM and cysteine-rich domains 1 (LMCD1;  $n = 3$ ; each replicate consists of a pool of 3–4 EHTs from 2 different separate batches), calnexin ( $n = 6$ ; each replicate consists of a pool of 3–4 EHTs from 2 different separate batches), and reticulocalbin-3 (RCN-3;  $n = 3$ ; each replicate consists of a pool of 3–4 EHTs from 2 different separate batches); Coomassie staining was used as a loading control, mean  $\pm$  SEM, unpaired two-sided Student's  $t$ -test,  $*P < 0.05$ .

C Immunofluorescence of 2D hiPSC-CM from PLN and PLN p.Arg14del with antibodies recognizing calnexin (green),  $\alpha$ -actinin (red), and DAPI staining for nuclei (blue); scale bar 20  $\mu$ m.

Source data are available online for this figure.

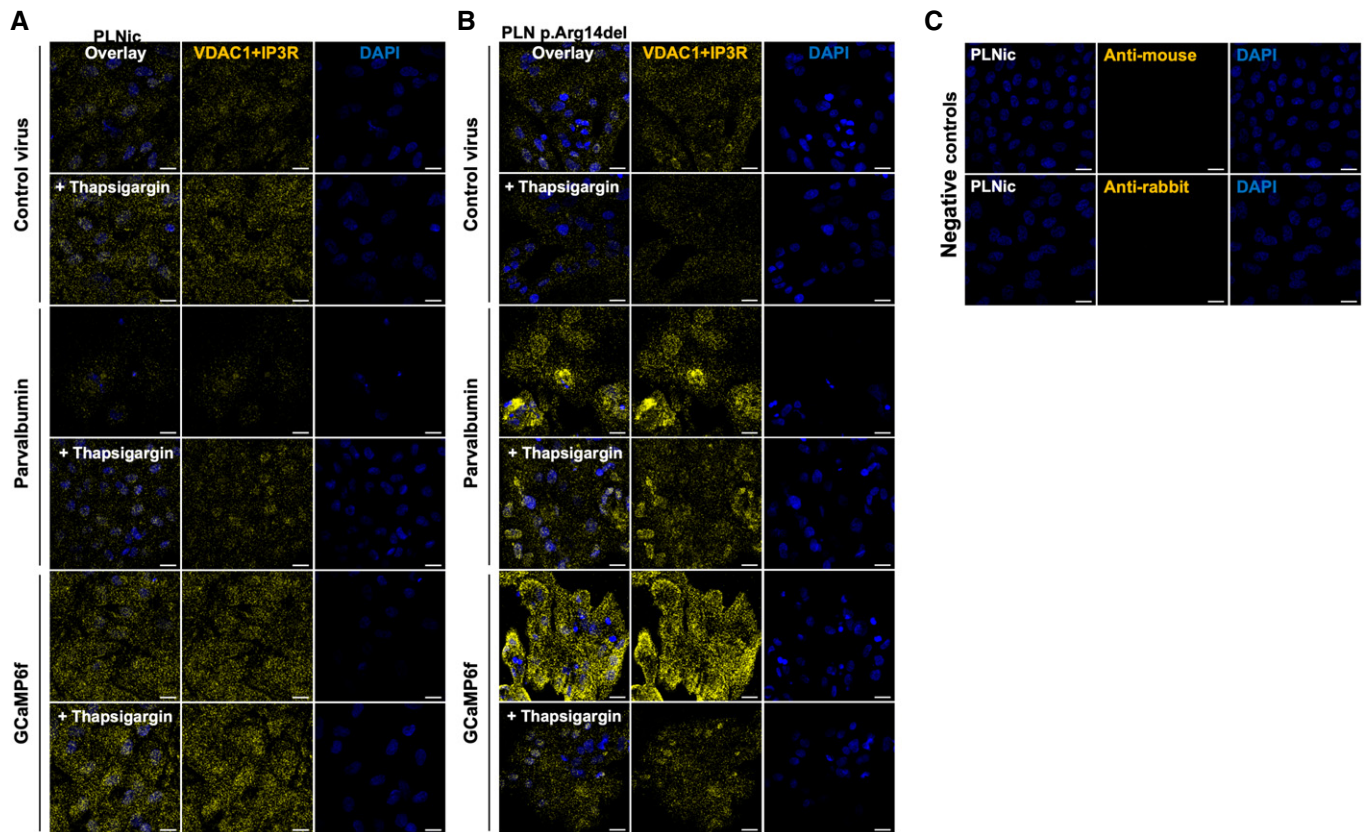

**Figure EV2. Investigation of protein–protein interaction.**

A, B Proximity ligation assays (PLAs; yellow) combining an anti-VDAC1 (localizing to the outer mitochondrial membrane) and an IP<sub>3</sub>R-antibody (localizing to the ER) and DAPI staining of nuclei (blue) at baseline and after thapsigargin (1.0 μM, 5 h) exposure for PLNic (A) and PLN p.Arg14del (B) after transduction with control, GCaMP6f, or parvalbumin virus.

C Negative control: Anti-mouse, anti-rabbit antibodies alone. Scale bar 20 μm.

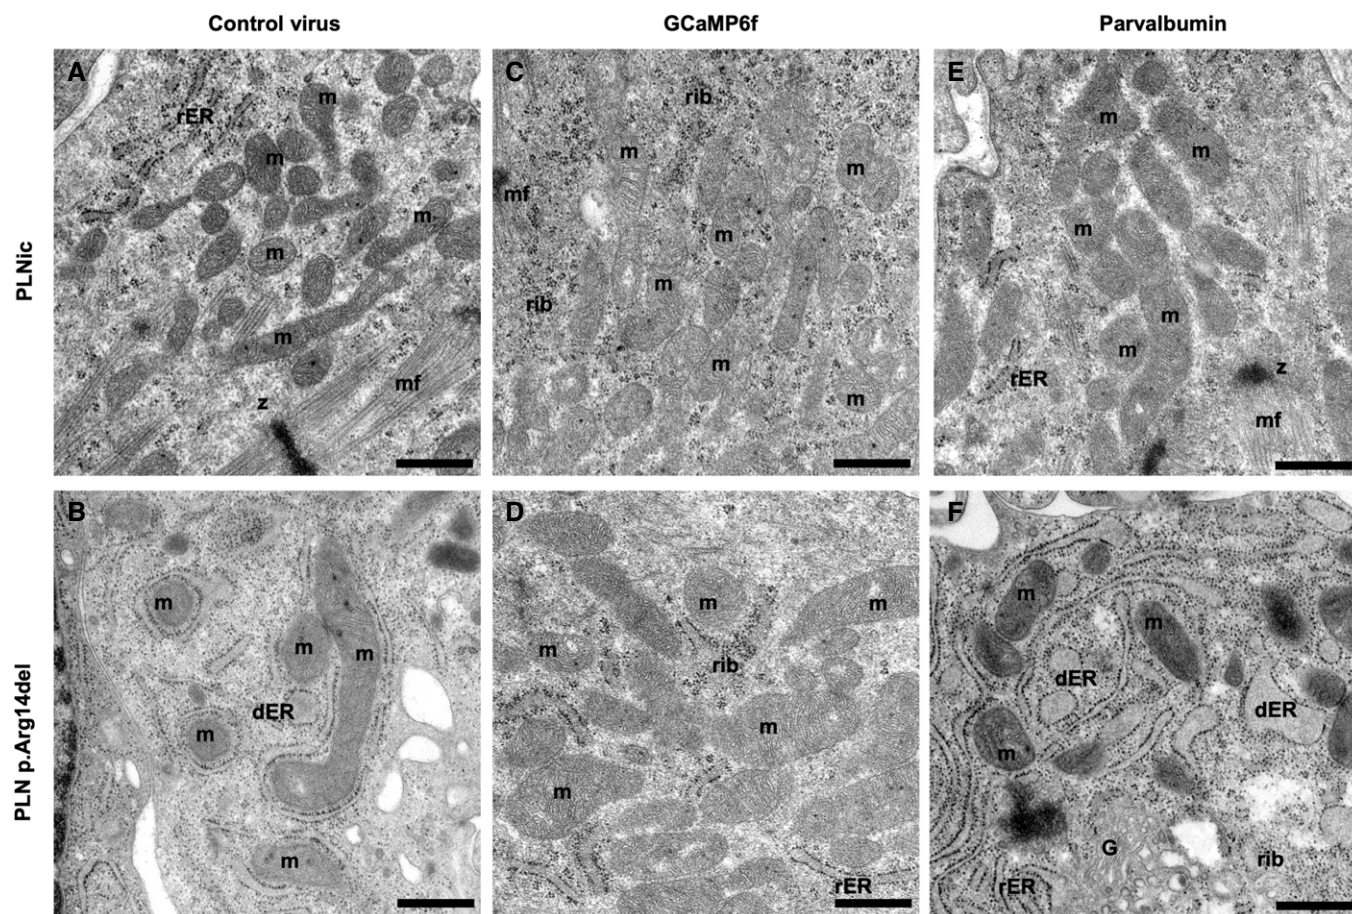

**Figure EV3. Transmission electron microscopy.**

A–F Transmission electron microscopy of PLNic and PLN p.Arg14del EHTs after transduction with control, GCaMP6f, or parvalbumin virus; mf: myofilaments, z: Z-line, rib: ribosome, m: mitochondria, rER: rough endoplasmic reticulum, dER: dilated endoplasmic reticulum, and G: golgi. Scale bar 500 nm.
