# Supplementary material for: Impairment of the ER/mitochondria compartment in human cardiomyocytes with PLN p.Arg14del mutation
Source: PubMed Central journal article supplement (PMC8185541; doi:10.15252/emmm.202013074), 2021-05-16

# Uncropped Western immunoblots

## Manuscript Figure 2A

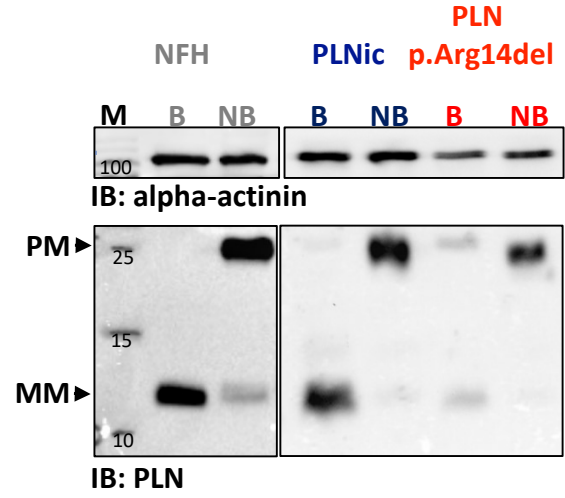

## Uncropped Figure 2A

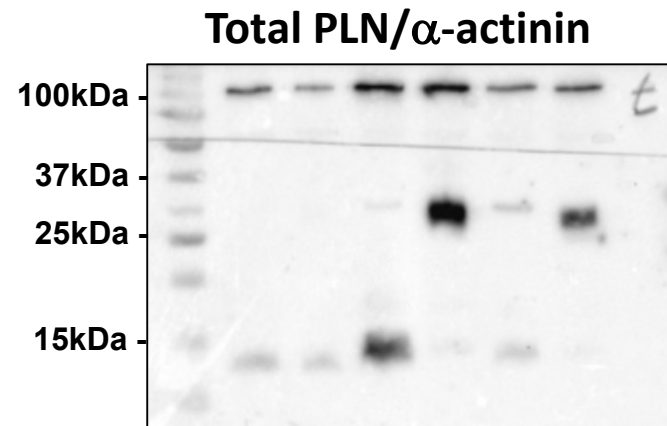

## Manuscript Figure 2C

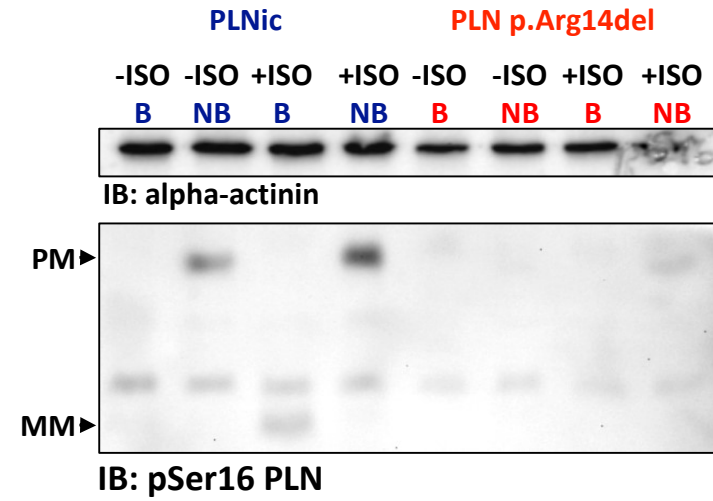

## Uncropped Figure 2C

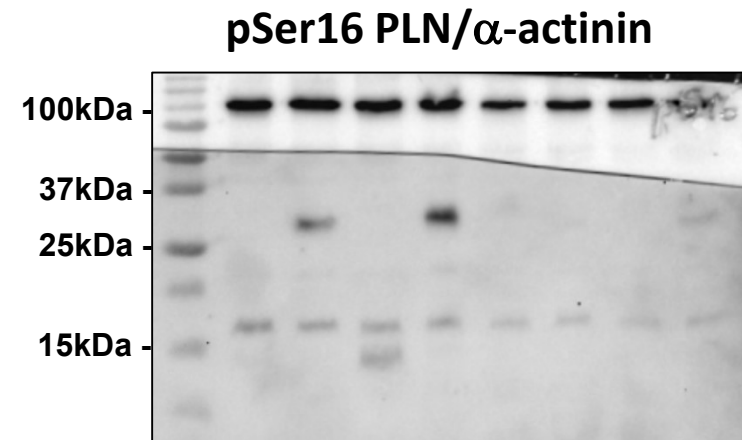

Supplement: EMMM-13-e13074-s004.pdf [file EMMM-13-e13074-s004.pdf]
