# Supplementary material for: Impairment of the ER/mitochondria compartment in human cardiomyocytes with PLN p.Arg14del mutation
Source: PubMed Central journal article supplement (PMC8185541; doi:10.15252/emmm.202013074), 2021-05-16
Supplement: EMMM-13-e13074-s011.pdf [file EMMM-13-e13074-s011.pdf]

# Appendix Figure S1-9

# Appendix Figure S1

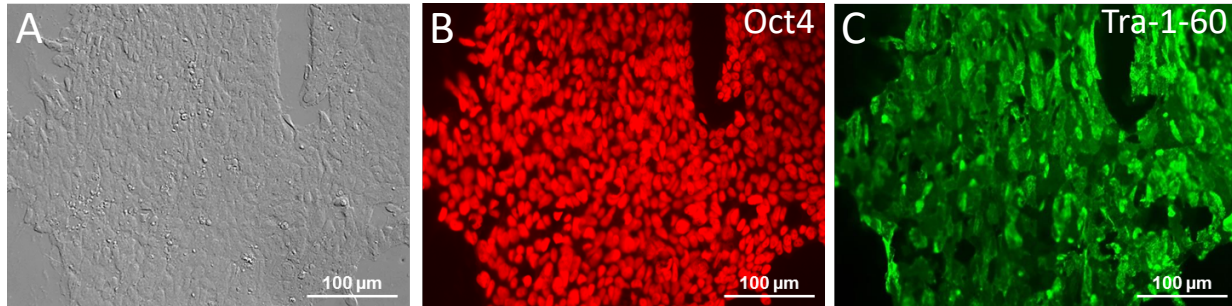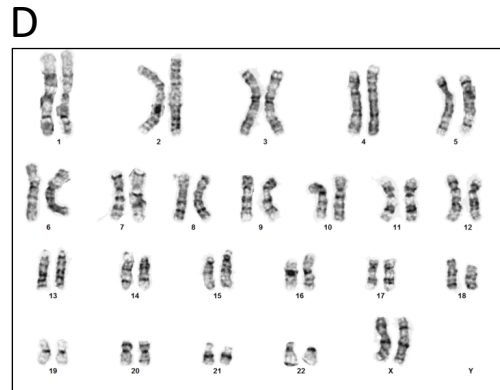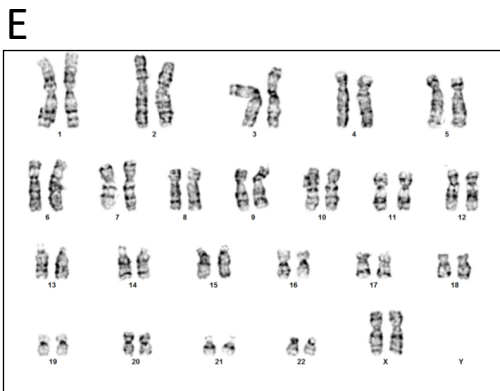

**F**

| Name | Sequence forward (5'-3')      | Sequence reverse (5'-3')      | PCR product size |
|------|-------------------------------|-------------------------------|------------------|
| OT1  | AGCAGGCAGCCCTATTT<br>TCAT     | AGAGAGGAGCAAGACA<br>GACTCA    | 555 bp           |
| OT2  | GACATGGCTGATTATAT<br>TCTTGCTG | GATCCAGGCTGGCTAAG<br>GTAG     | 508 bp           |
| OT3  | GGGAGCCCACTGATGT<br>GAAG      | ACAATCTCAACGTGGAA<br>TAGGGA   | 530 bp           |
| OT4  | GGGTGGGCTGAGCCAA<br>TAAT      | TGAGTATACATTGCTTTG<br>GAGTACA | 657 bp           |
| OT5  | AGGCACTCGCAAGCTTC<br>TTT      | CAGCAGAAGTGTACTION<br>AAAGACC | 530 bp           |
| OT6  | CCTCATGTATCTGCAGG<br>TGTGT    | TGCCACAATGGCTAGTG<br>TATGT    | 720 bp           |
| OT7  | TGTCTCACTCAACATAC<br>GTGGT    | CTGAGGAAGCAGGAGA<br>GGAGTA    | 815 bp           |
| OT8  | TTGTTCTGCCAGGACCC<br>TAAG     | TGAGCACCACAAAATGG<br>GACT     | 501 bp           |
| OT9  | AGGGTGGGTGACTGAG<br>TGTT      | ACTTGTGATGGGAGTCG<br>CTTT     | 587 bp           |
| OT10 | AAGTCTGTGACAGGTTT<br>AGGG     | ATTGGCAAAAGCAACTG<br>CGAG     | 502 bp           |

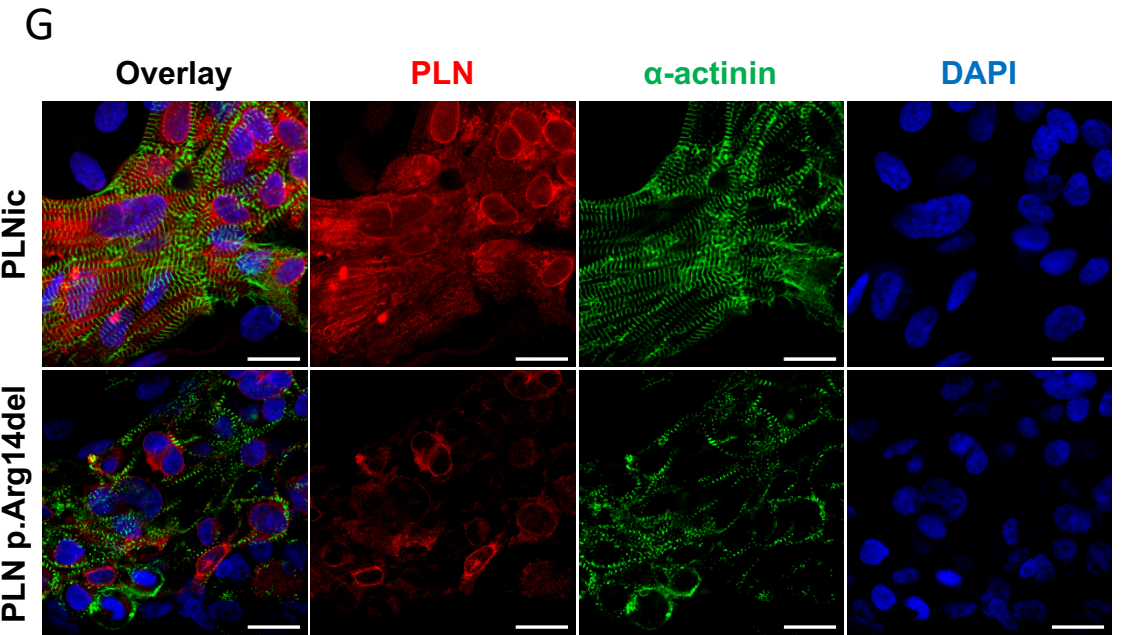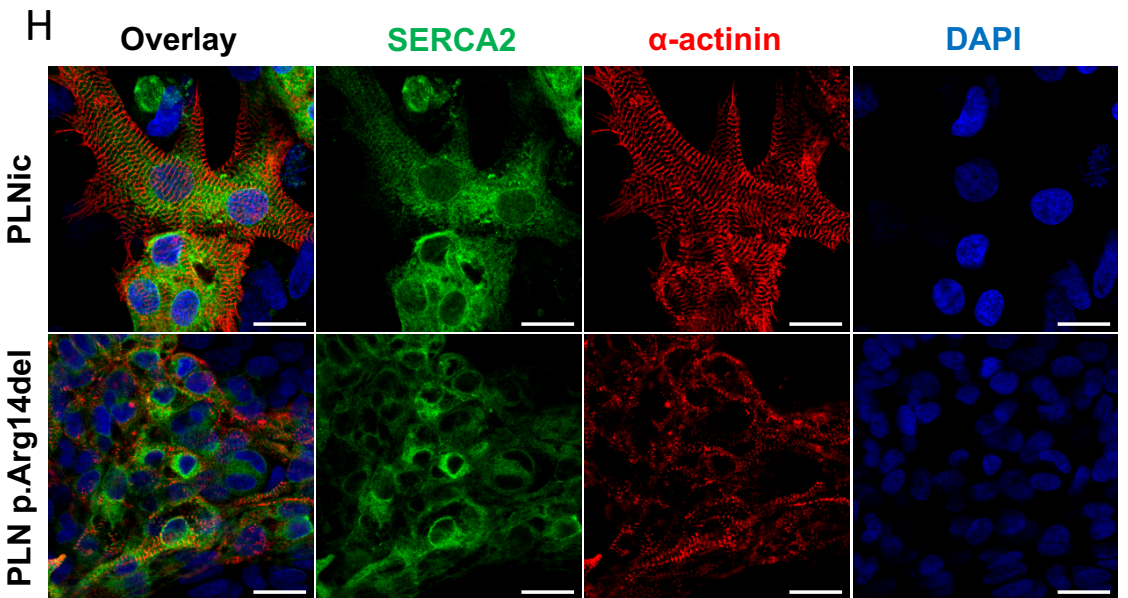

**Appendix Figure S1.** Characterization of hiPSC and hiPSC-CM. **A:** Bright field microscopy and immunofluorescence for pluripotency markers: **B:** Oct4 (red) and **C:** Tra-1-60 (green). G-banding chromosome analysis for **D:** PLN p.Arg14del hiPSC and **E:** isogenic control hiPSC demonstrating normal karyotype (46, XX). **F:** PCR primer sequences and estimated product size for off target (OT) sequencing. **G, H:** Immunofluorescence of 2D hiPSC-CM from PLNic and PLN p.Arg14del with antibodies against PLN (red),  $\alpha$ -actinin (green and red), SERCA2 (green); DAPI staining for nuclei (blue); scale bar 20  $\mu$ m.

# Appendix Figure S2

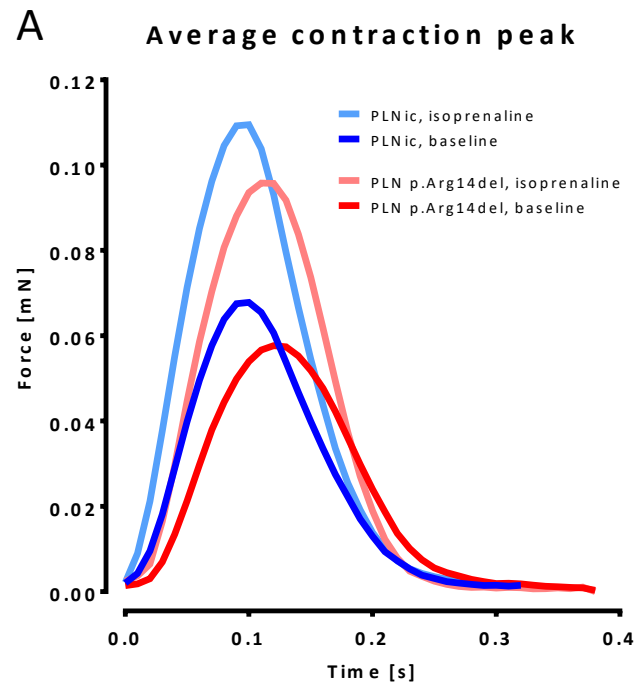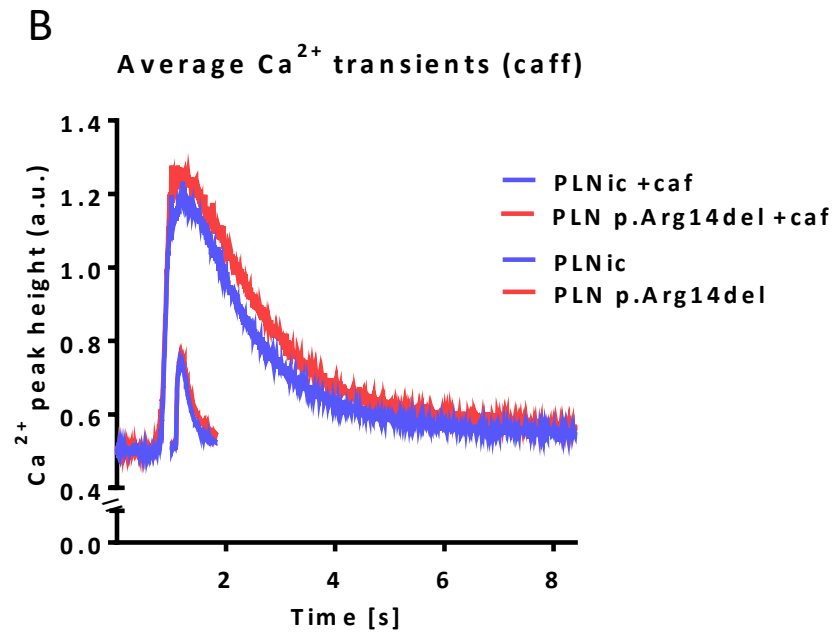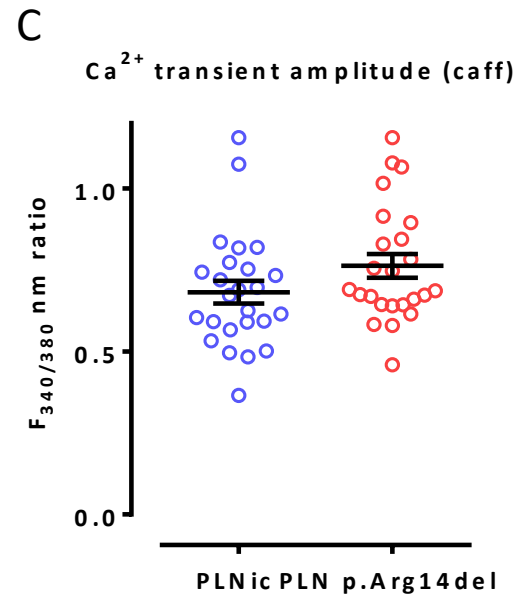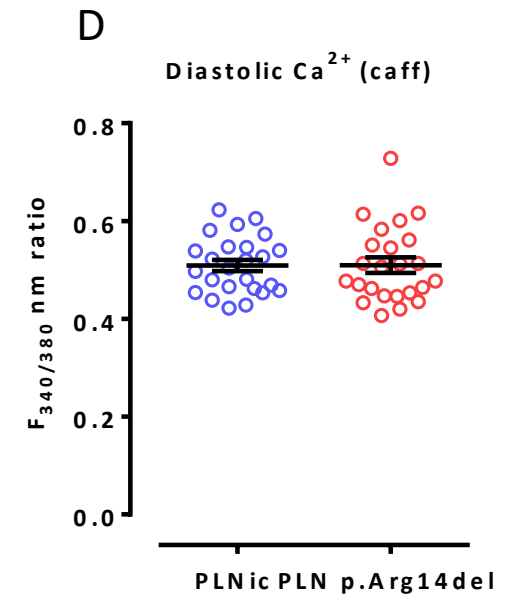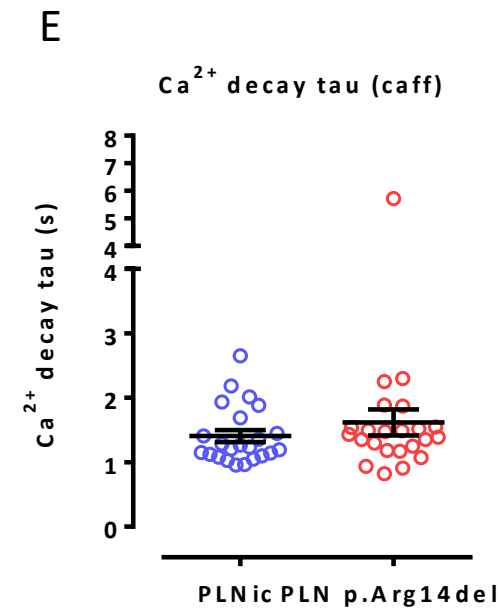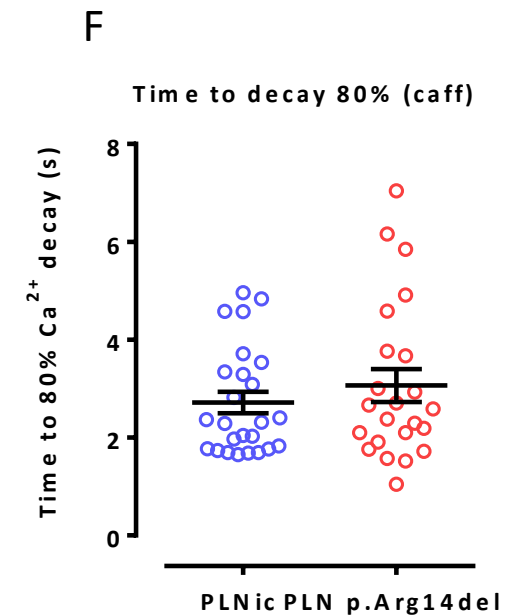

**Appendix Figure S2. A:** Average force contraction peak for PLNic and PLN p.Arg14del at baseline (EC50 [Ca<sup>2+</sup>]) and in response to isoprenaline (ISO; 100 nM), data are related to Figure 2E, F. Ca<sup>2+</sup> transient analysis in FURA 2-loaded 2D hiPSC-CM after caffeine puff (20 mM). **B:** Average Ca<sup>2+</sup> transient peak, **C:** Ca<sup>2+</sup> transient amplitude, **D:** Diastolic Ca<sup>2+</sup>, **E:** Time to decay 80% and **F:** Ca<sup>2+</sup> decay tau; PLNic: n=25 hiPSC-CM from 2 batches and PLN p.Arg14del: n=24 hiPSC-CM from 2 batches, mean ± SEM, Mann–Whitney U test, \*p<0.05. The data are representative of n= 2 independent experiments.

# Appendix Figure S3

A

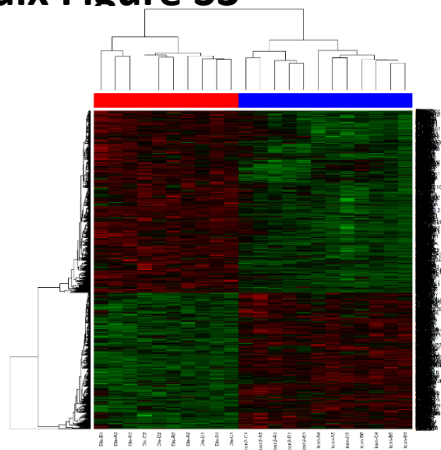

B

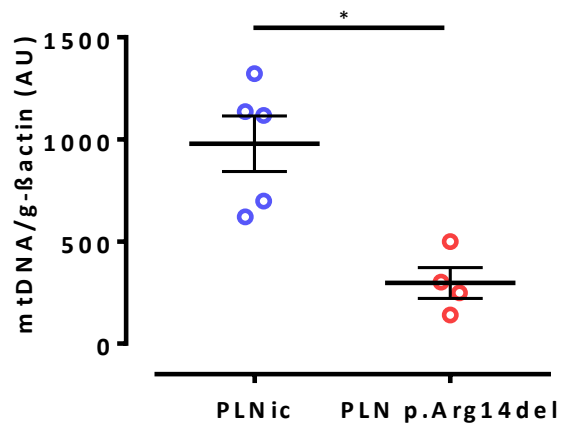

C

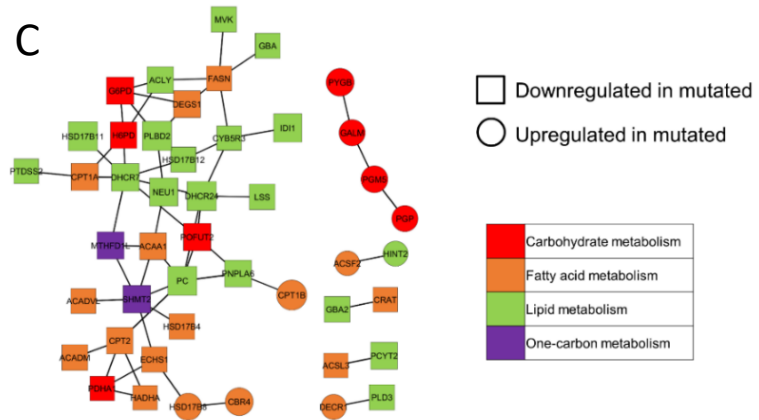

D

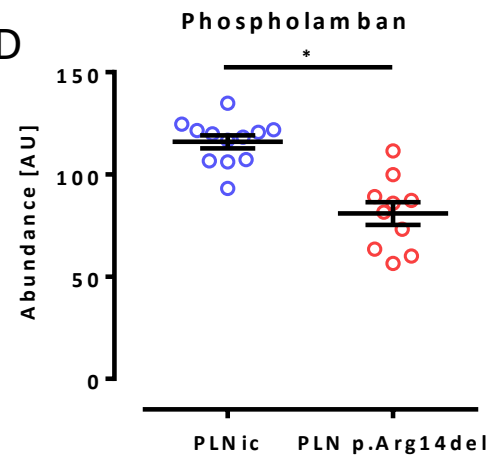

G

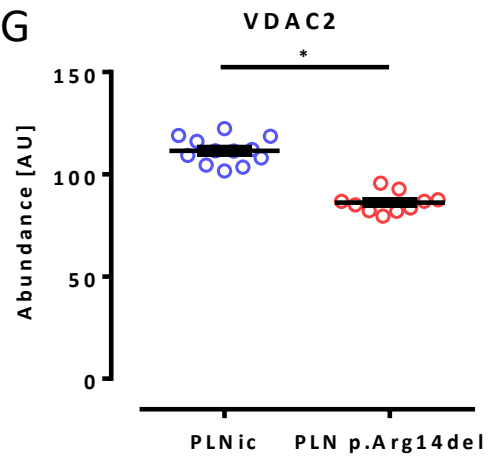

K

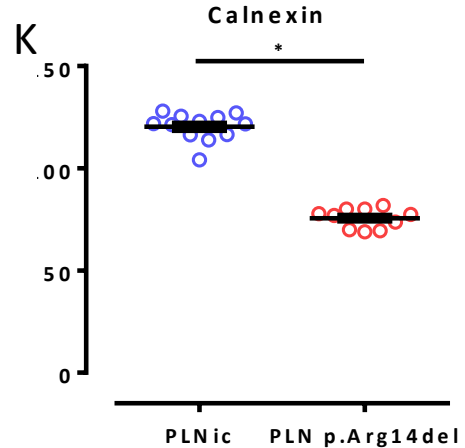

E

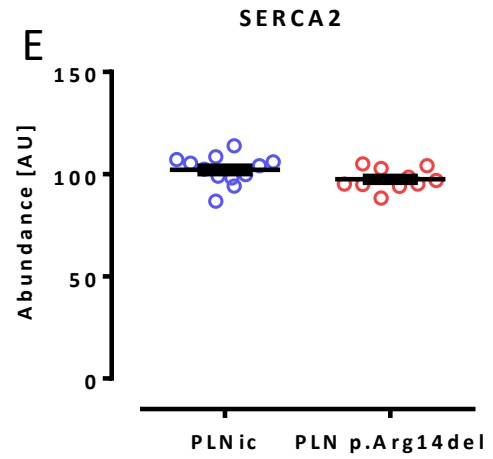

H

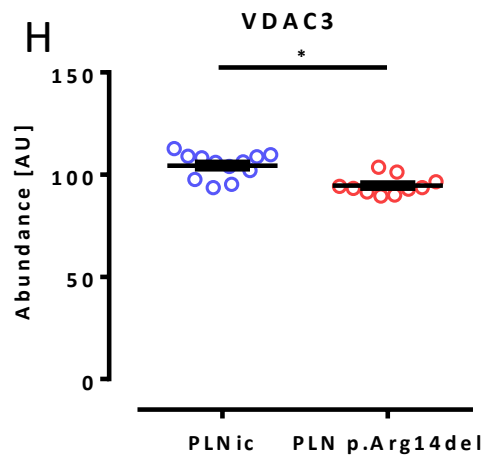

F

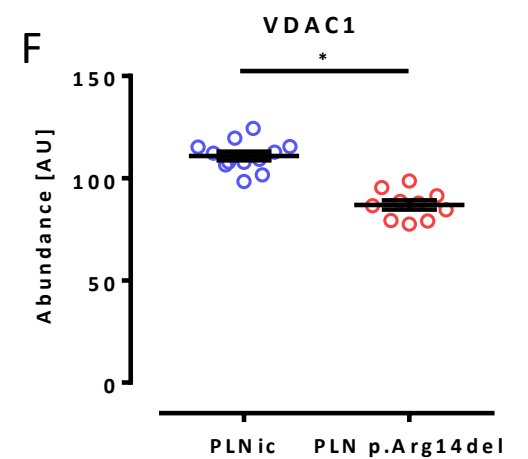

I

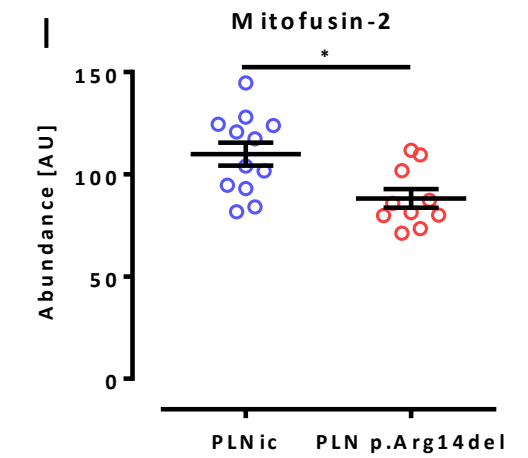

**Appendix Figure S3. A:** Heat map representation of differentially abundant proteins after unsupervised hierarchical clustering (ANOVA, FDR<0.05). **B:** PCR amplification of genomic DNA for the mitochondrial encoded NADH dehydrogenase (Mt-ND1/2), normalized to the nuclear-encoded gene actin; PLNic: n=5 EHTs, PLN p.Arg14del n=4 EHTs, mean±SEM, Mann–Whitney U test, \*p< 0.05. **C:** Co-expression network of differentially abundant proteins, which are related to metabolism (according to Uniprot characterization). **D-K:** Protein abundance of selected candidate proteins in the proteome screen, data extracted from **Table EV1**, PLNic: n=12, PLN p.Arg14del n=10, mean ± SEM, false discovery rate, \* p<0.05.

# Appendix Figure S4

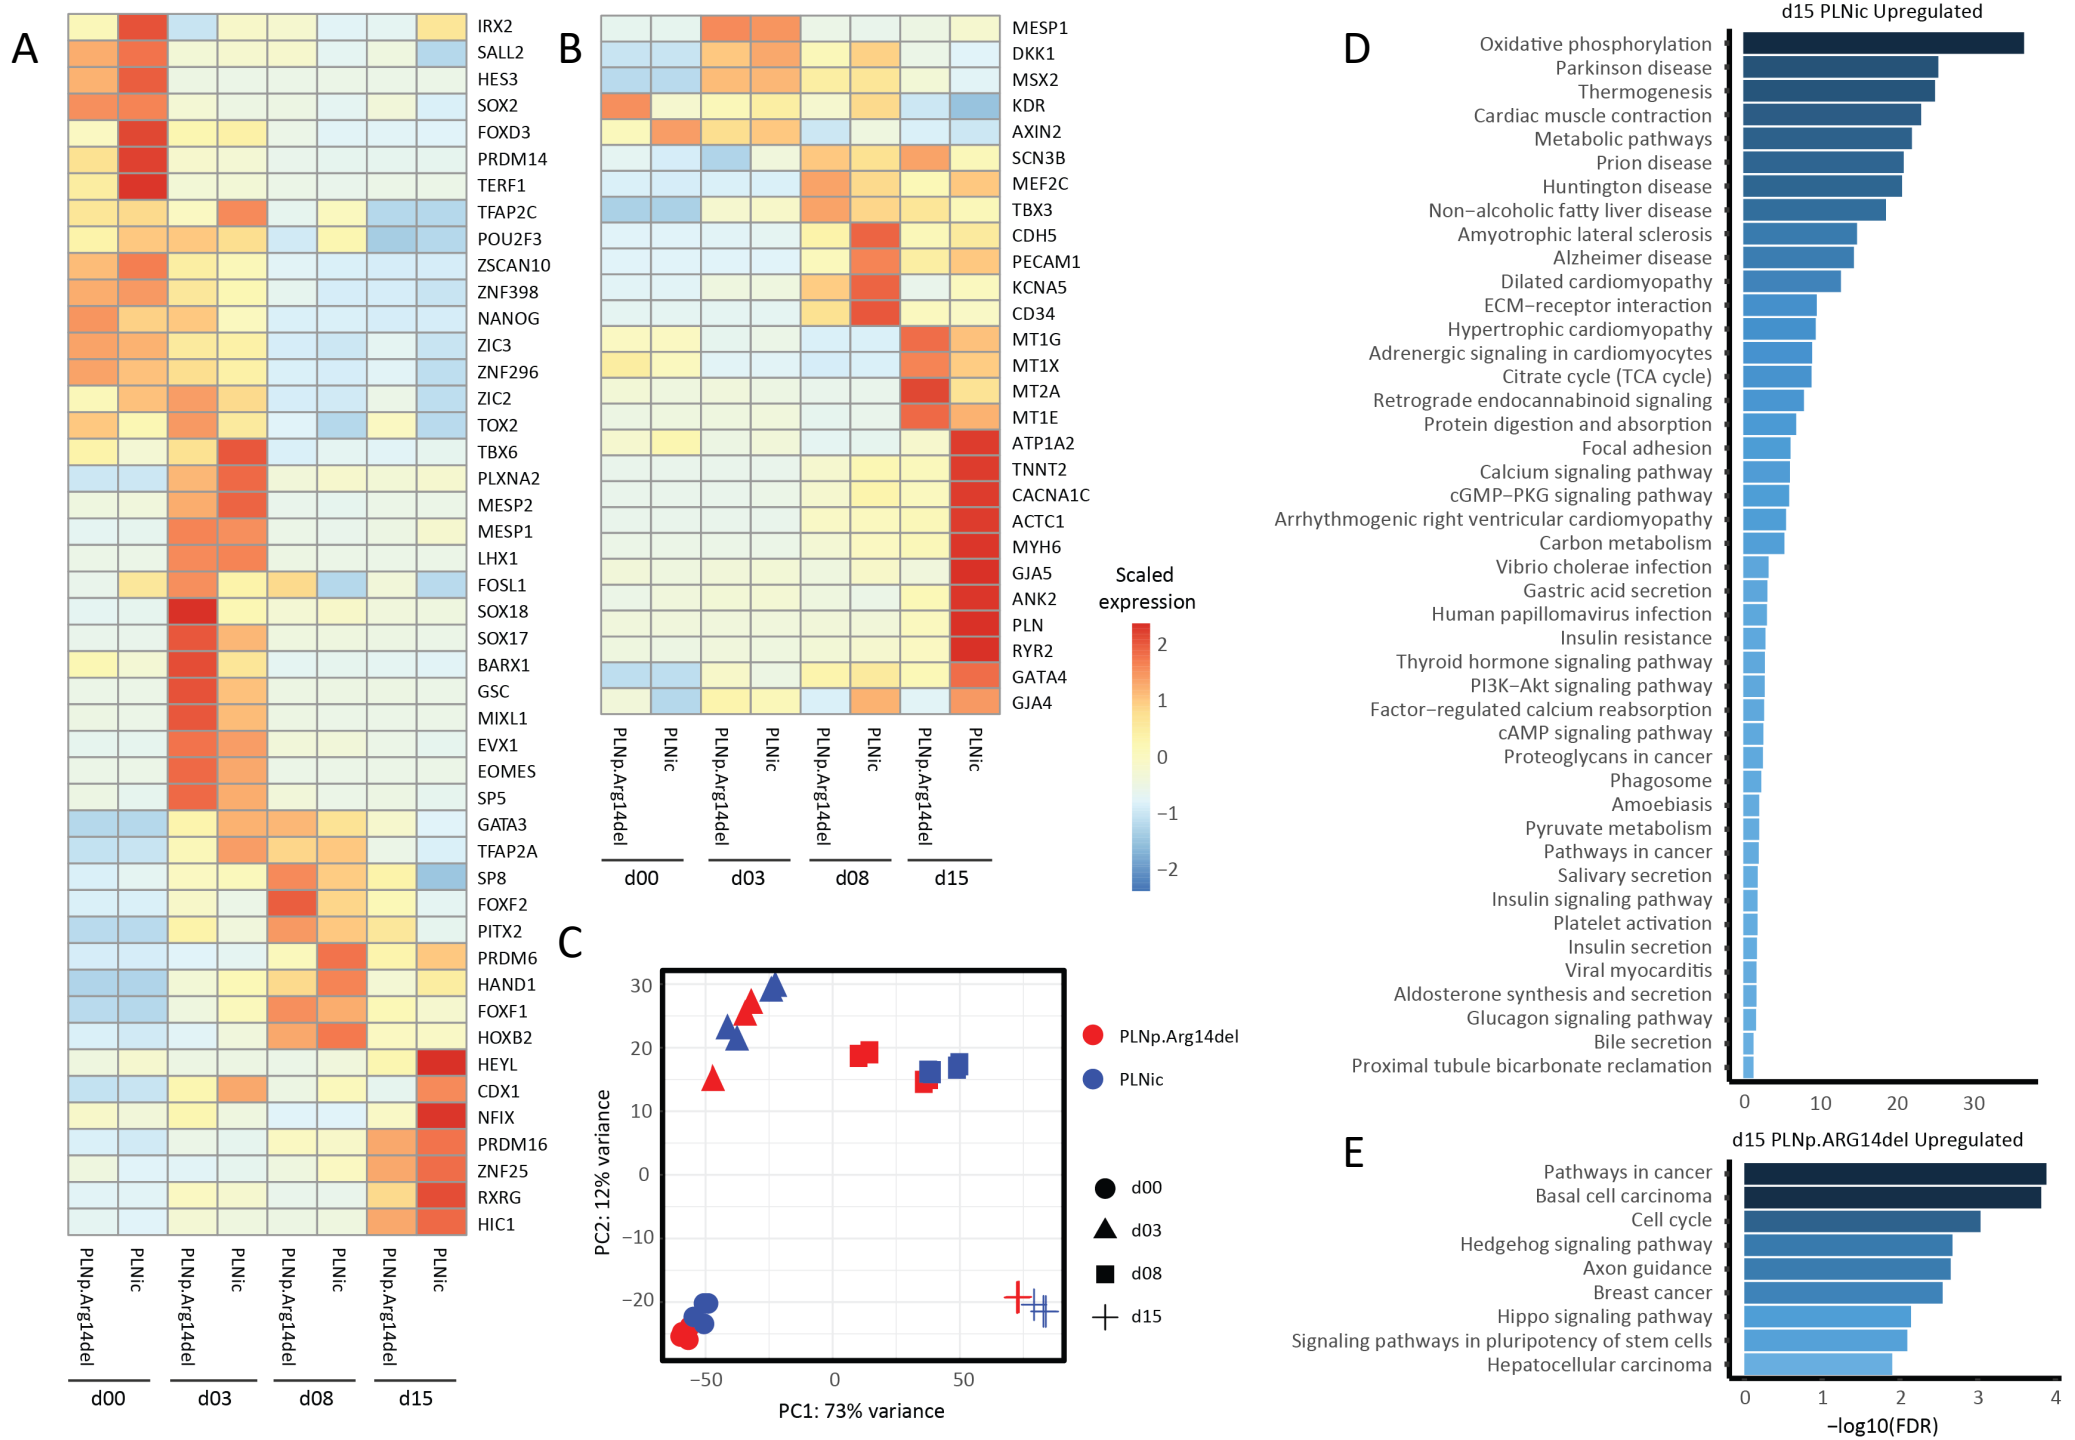



**Appendix Figure S4.** RNA sequencing analysis at different time points of cardiac differentiation of PLNic and PLN p.Arg14del hiPSC on day 0 (d00; hiPSC), day 3 (d03; mesodermal progenitors), day 8 (d08; cardiac progenitors) and day 15 (d15; early cardiomyocytes). **A, B** Heatmap of stage-specific markers of cardiac differentiation. The heatmap is scaled by row (gene) and the selected genes correctly define different stages of differentiation for both, PLNic and PLN p.Arg14del. **C:** Principal component analysis of PLNic and PLN p.Arg14del, n= 3-4 replicates, The data are representative of n= 2 independent differentiation rounds. **D, E:** Analysis of KEGG pathways of d15 samples that were significantly upregulated in PLNic (**D**) and PLN p.Arg14del (**E**).

# Appendix Figure S5

**A**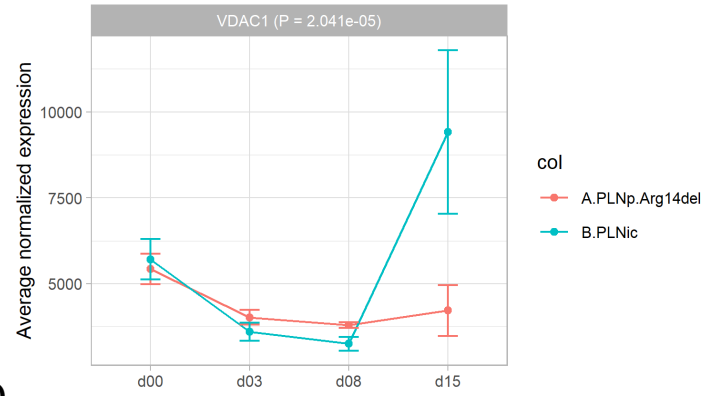**B**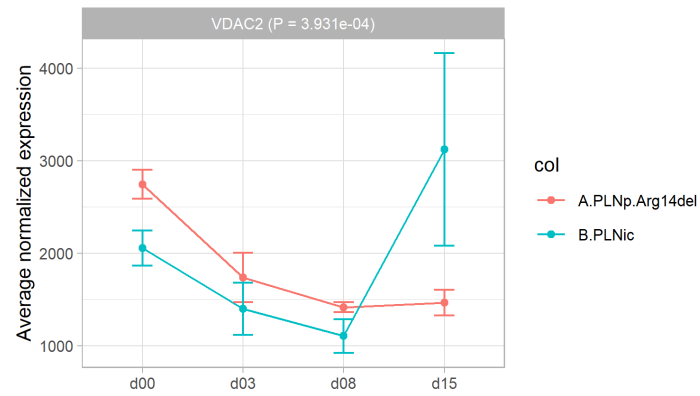**C**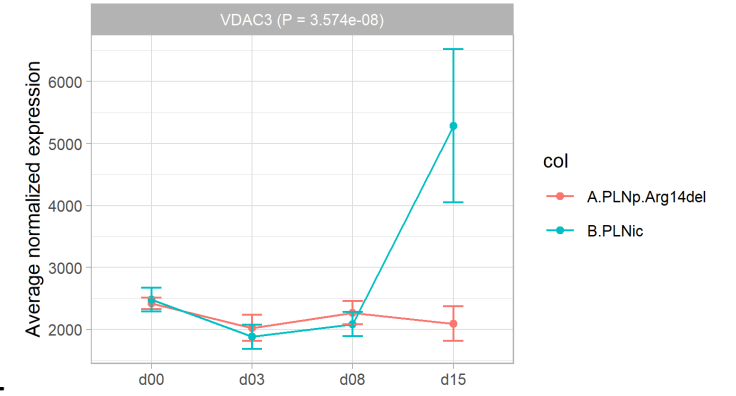**D**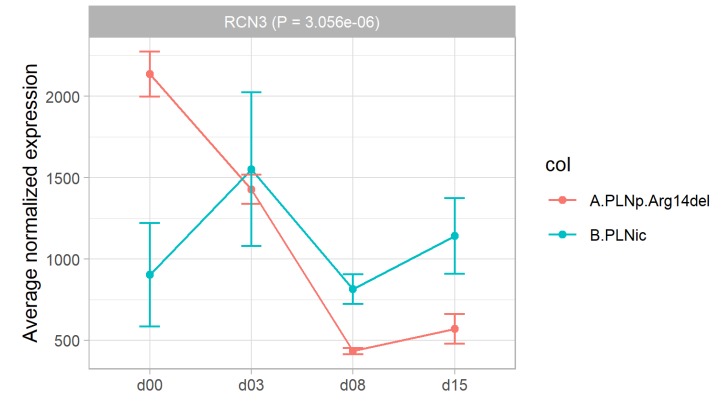**E**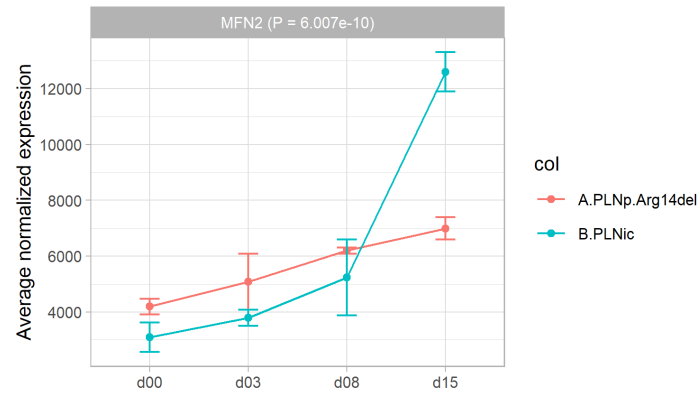**F**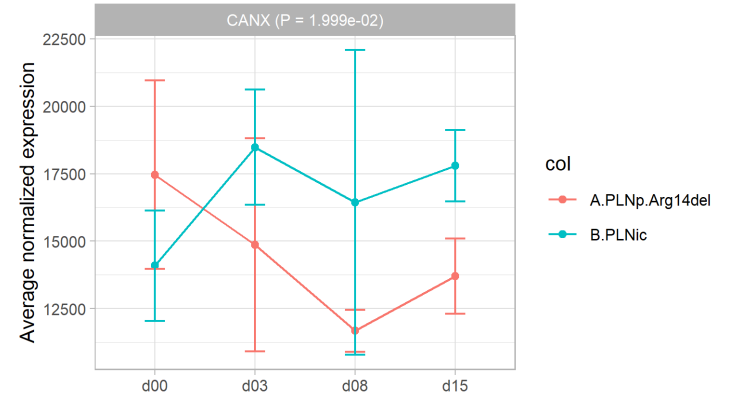**G**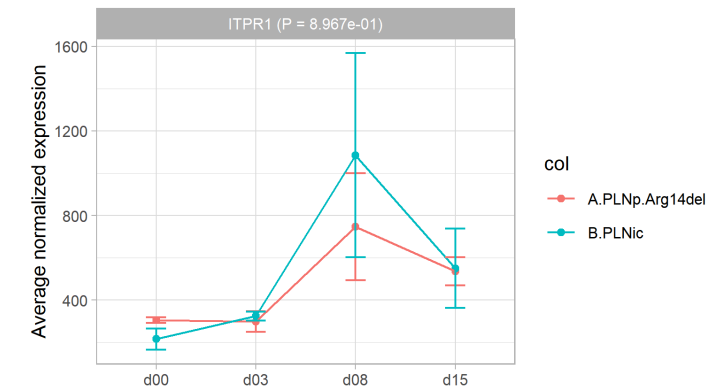**H**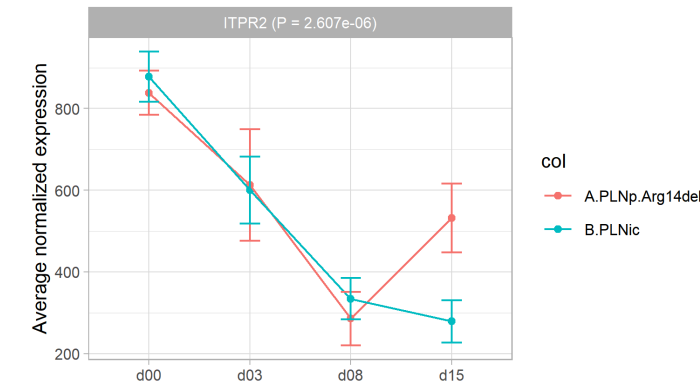**I**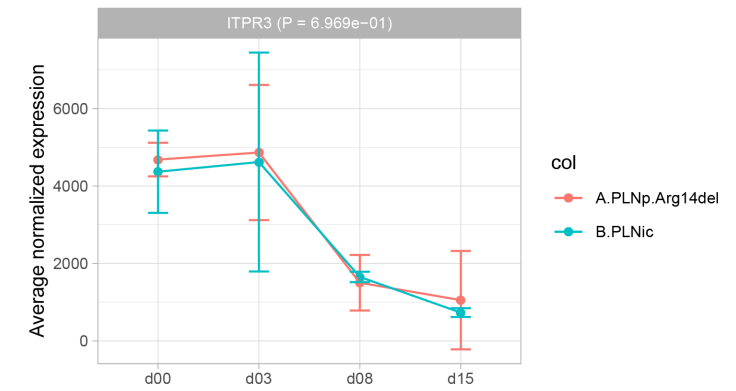

**Appendix Figure S5.** RNA sequencing analysis. **A-I:** Transcriptional expression profile of *VDAC1*, *VDAC2*, *VDAC3*, *MFN2*, *CANX*, *RCN3*, *ITPR1*, *ITPR2*, *ITPR3* at day 0, 3, 8, 15 of cardiac differentiation of PLNic and PLN p.Arg14del. 'P' indicates the adjusted p value of the difference in gene expression between PLNic and PLN p.Arg14del calculated by DESeq2 at day 15 of cardiac differentiation.

# Appendix Figure S6

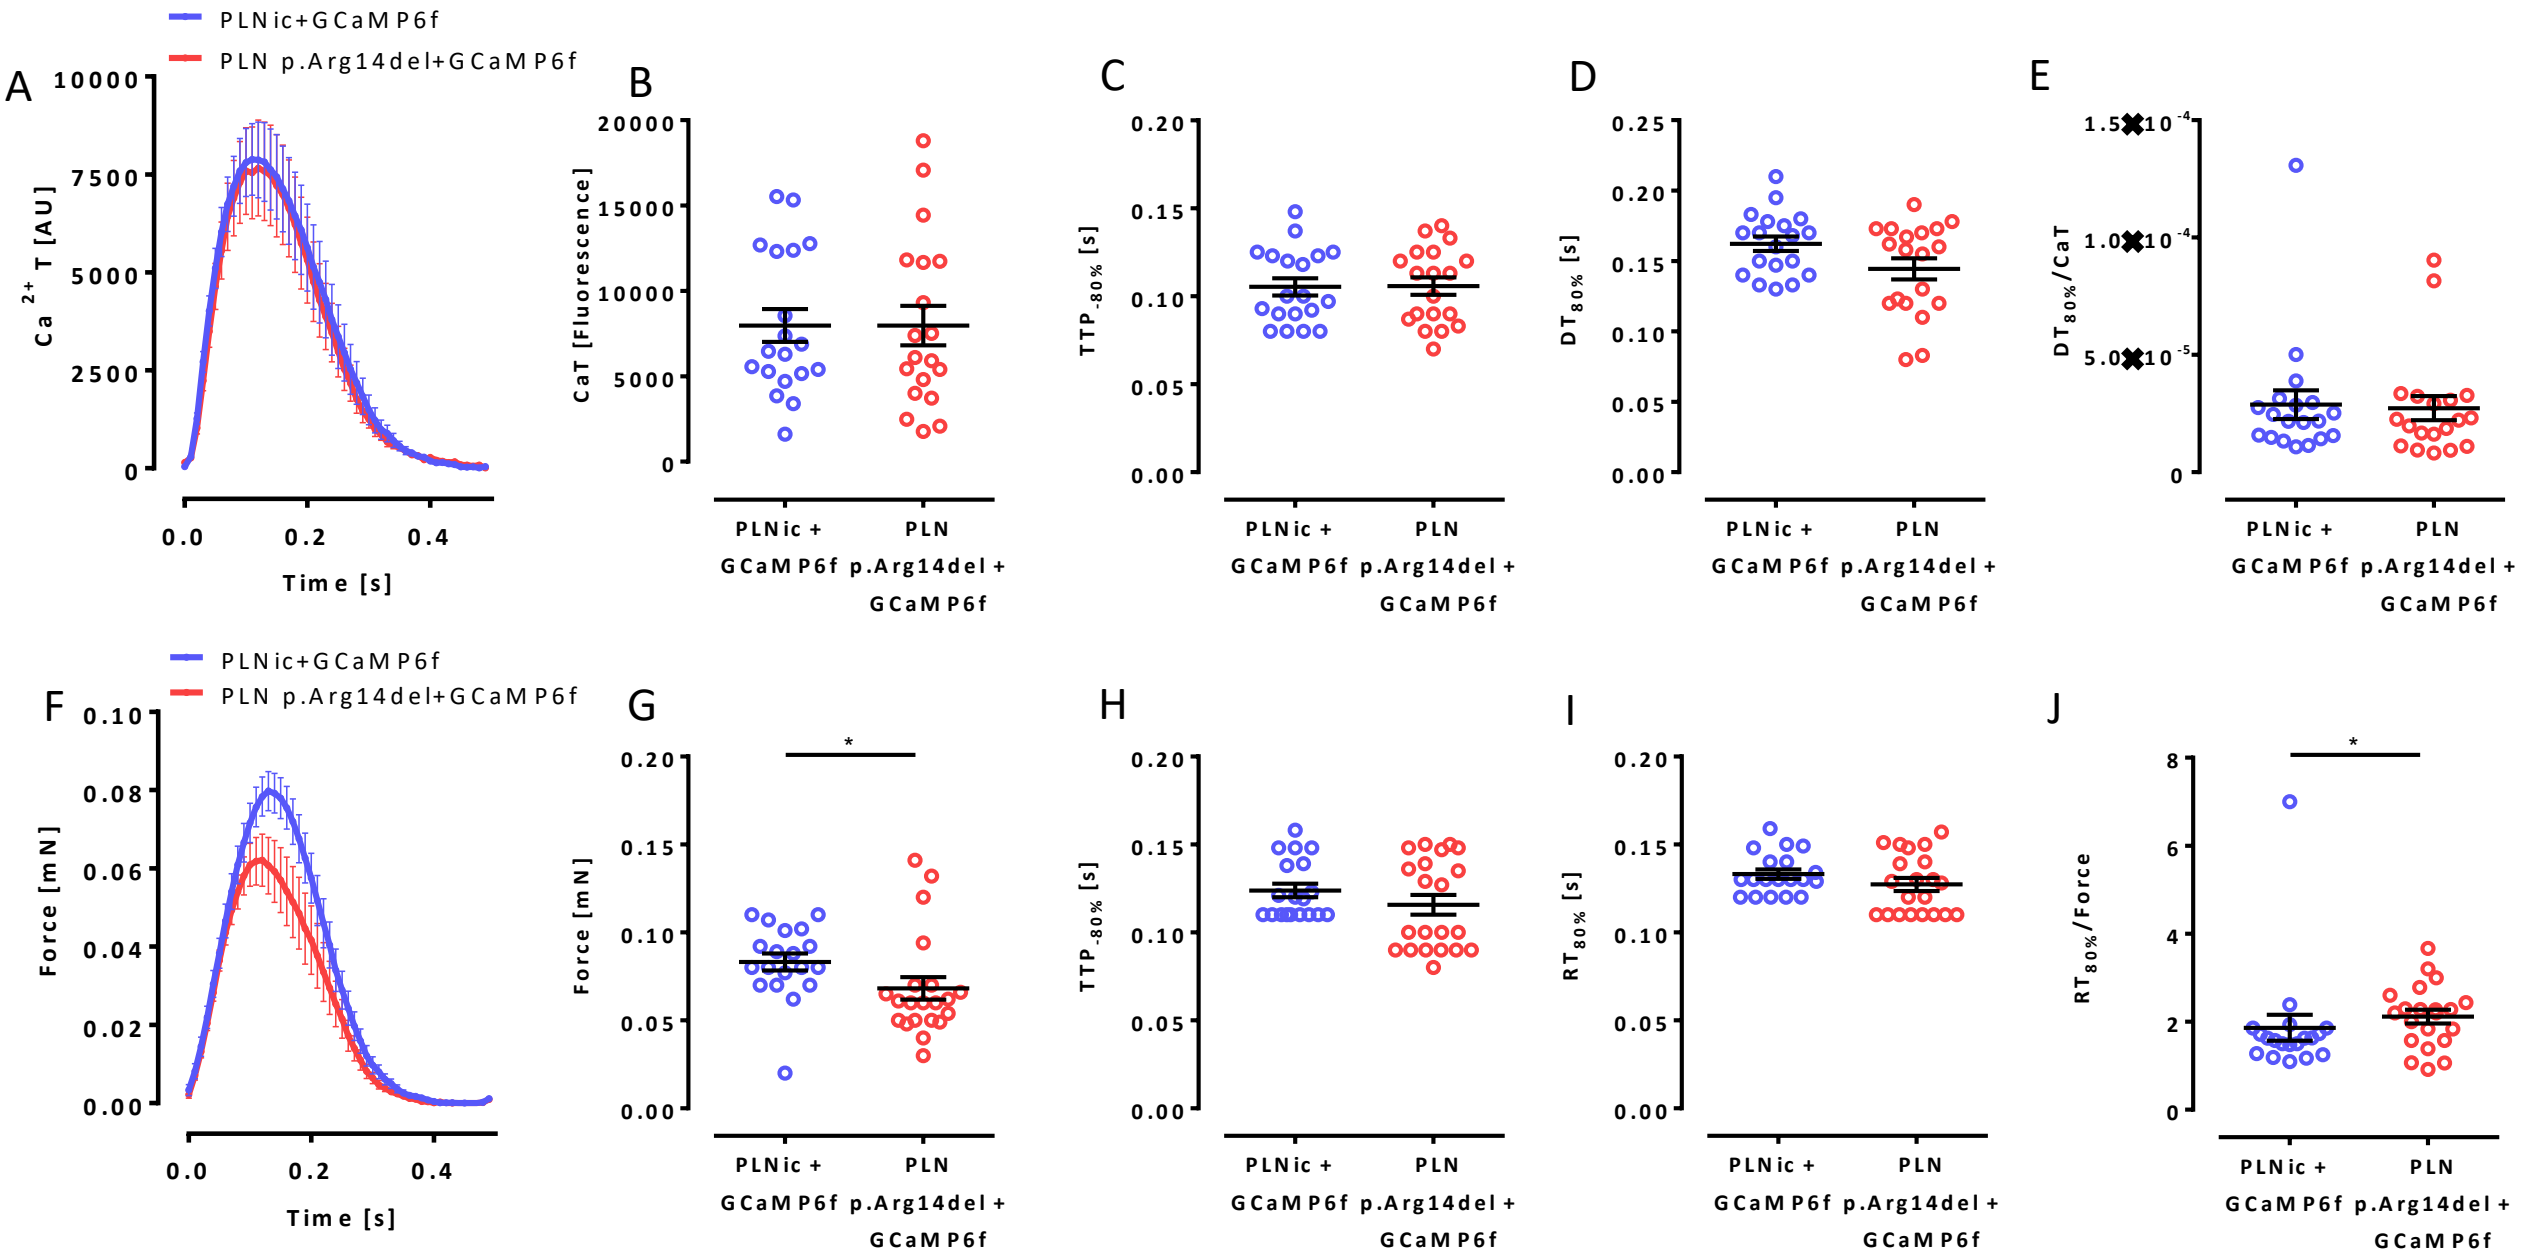

**Appendix Figure S6.** Ca<sup>2+</sup> transient and force analysis of GCaMP6f-transduced EHTs. **A:** Average Ca<sup>2+</sup> transient peak, **B:** Fluorescence amplitude, **C:** Ca<sup>2+</sup> time to peak (TTP<sub>80%</sub>), **D:** Ca<sup>2+</sup> decay time (DT<sub>80%</sub>), **E:** DT<sub>80%</sub>/fluorescence amplitude ratio, **F:** Average force peak, **G:** force amplitude, **H:** force time to peak (TTP<sub>80%</sub>), **I:** force relaxation time (RT<sub>80%</sub>), **J:** RT<sub>80%</sub>/force amplitude ratio. Mean ± SEM, PLN<sup>Nic</sup>: n=19 EHTs; PLN p.Arg14del: n=21 EHTs. Mann–Whitney U test, \* p<0.05. The data are representative of 3 different batches.

# Appendix Figure S7

A) Control virus  
Overlay

PLN

SERCA2

DAPI

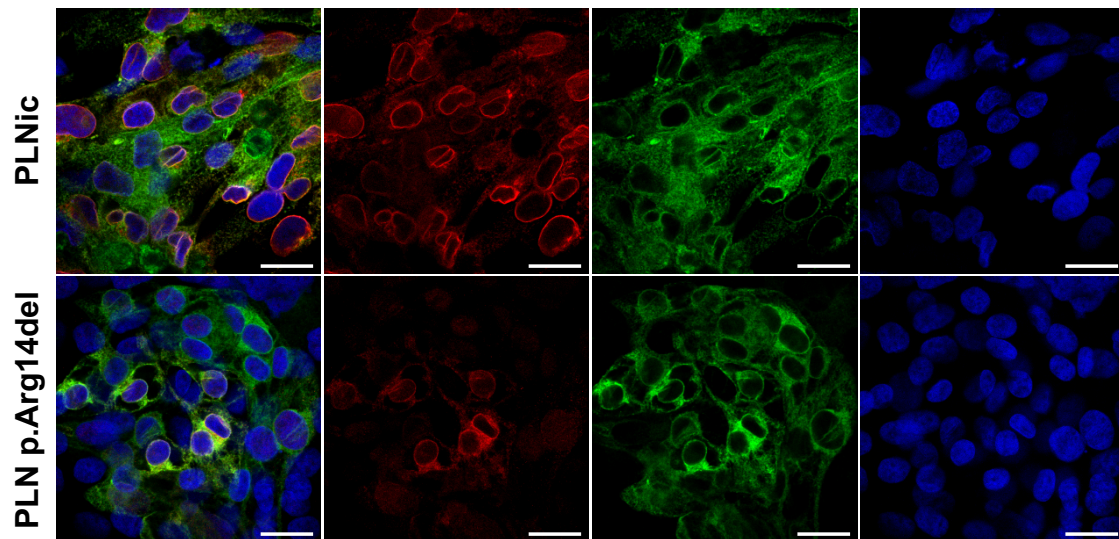

C) Parvalbumin  
Overlay

PLN

SERCA2

DAPI

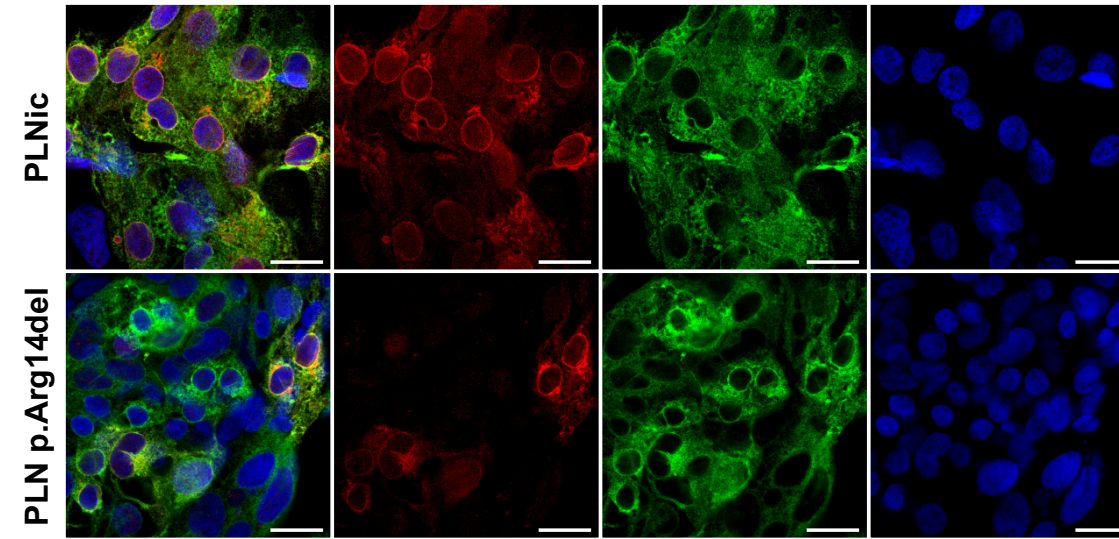

B) GCaMP6f  
Overlay

PLN

SERCA2

DAPI

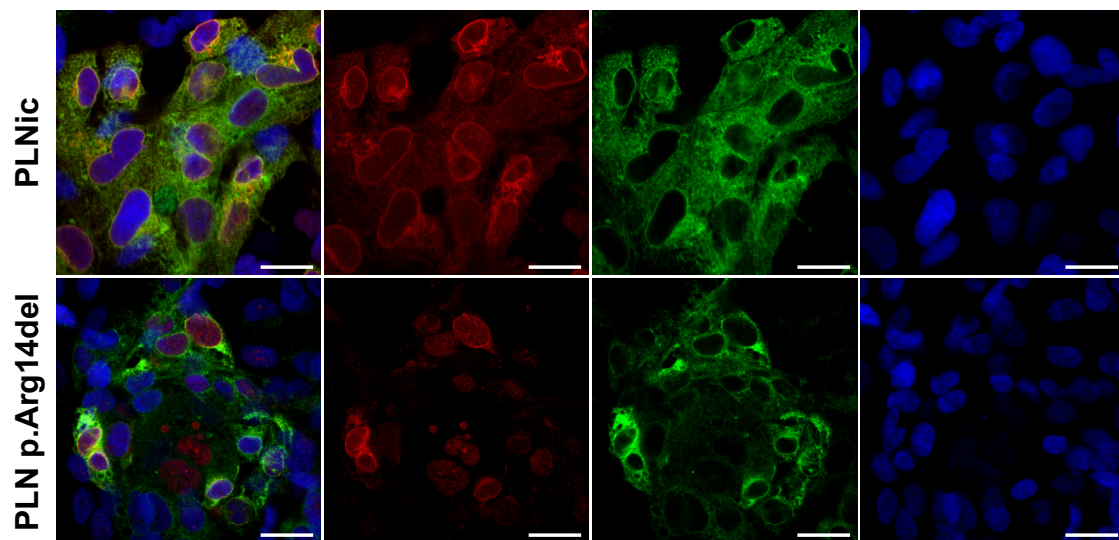

D) Overlay

GFP

DAPI

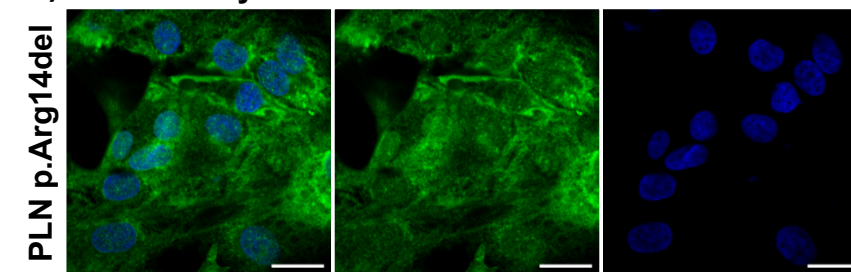

E) Overlay

Parvalbumin

DAPI

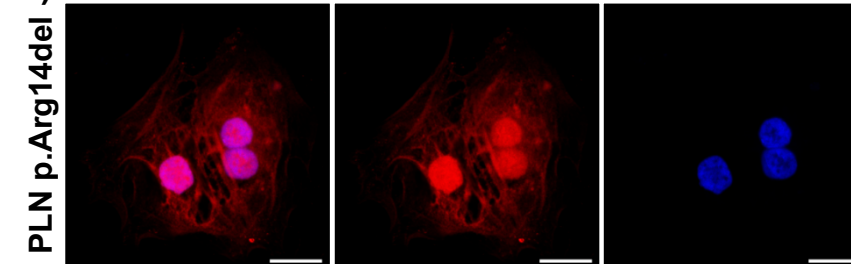

**Appendix Figure S7.** Immunofluorescence of 2D hiPSC-CM from PLN<sup>Nic</sup> and PLN p.Arg14del after transduction with a control virus **A.**, a virus encoding for GCaMP6f **B.** or parvalbumin **C.** with antibodies recognizing PLN (red), SERCA2 (green), DAPI staining for nuclei (blue), **D.** PLN p.Arg14del hiPSC-CM after transduction with a virus encoding for GCaMP6f using an antibody detecting GFP, **E.** PLN p.Arg14del hiPSC-CM after transduction with a virus encoding for parvalbumin with an antibody detecting parvalbumin; scale bar 20  $\mu\text{m}$ .

# Appendix Figure S8

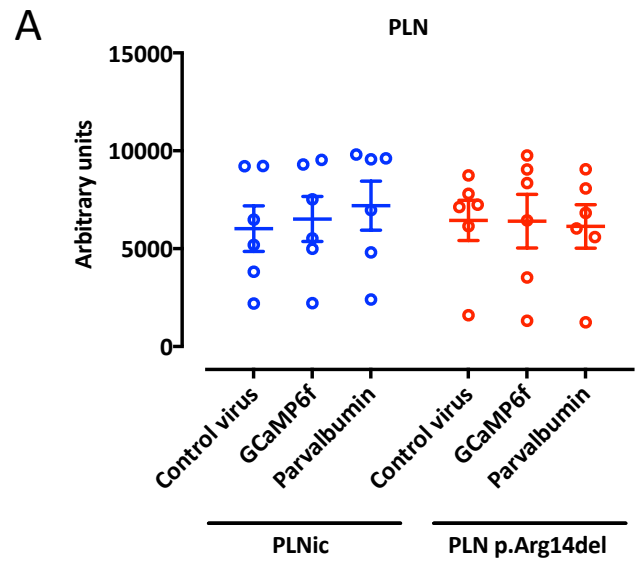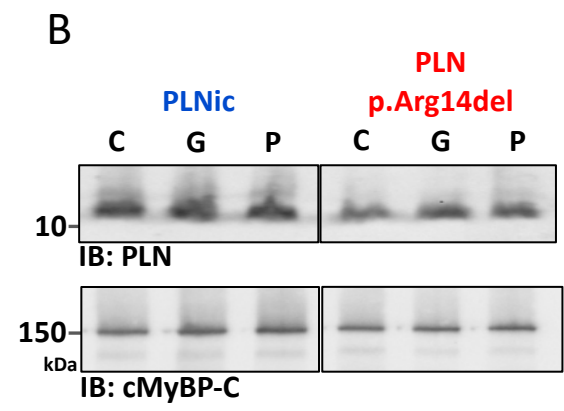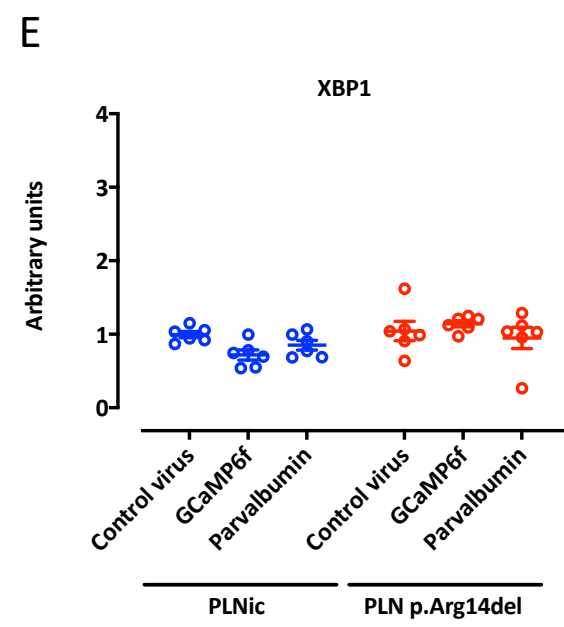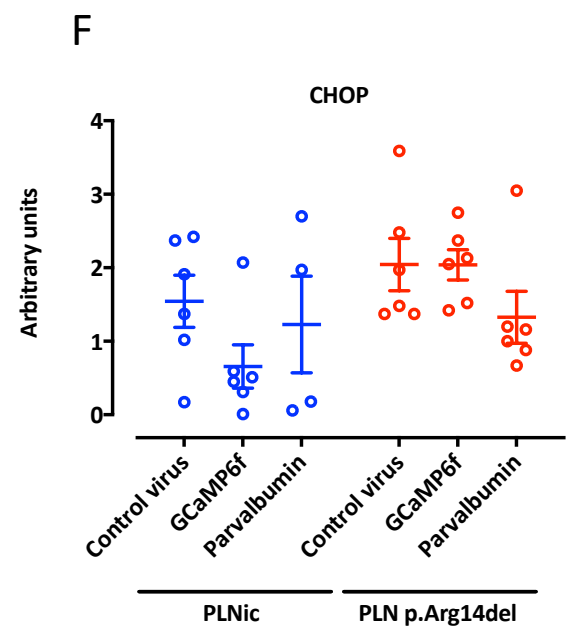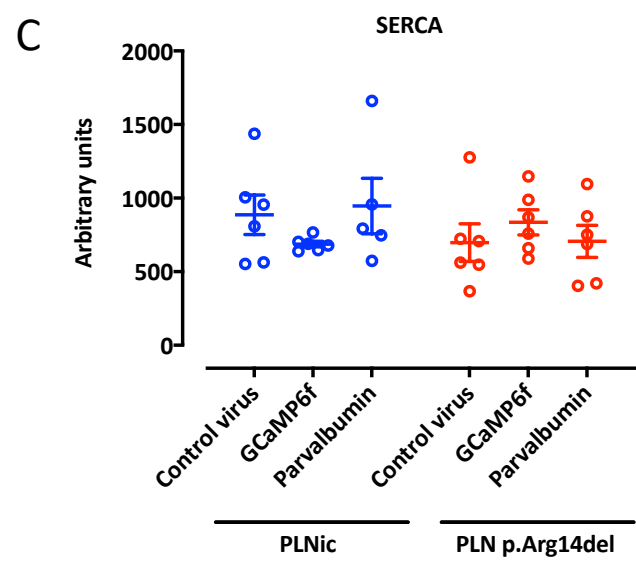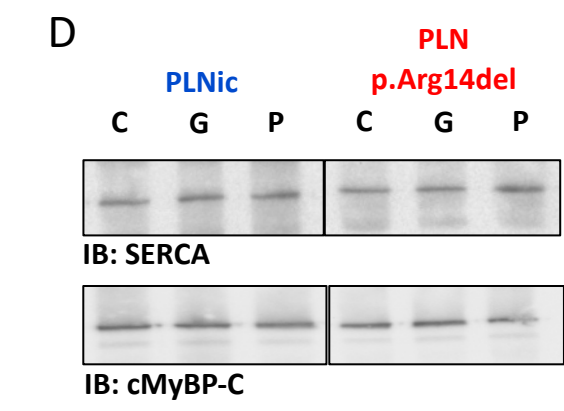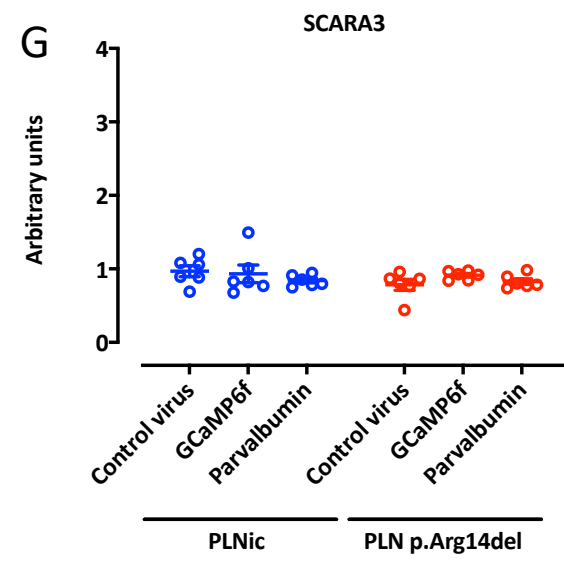



**Appendix Figure S8. A-D.** Western immunoblots for PLN and SERCA2 for PLNic and PLN p.Arg14del hiPSC-CM after transduction with control-, GCaMP6f- or parvalbumin-virus, n= 6-9, each replicate consists of a pool of 2-3 EHTs. Two-way ANOVA (comparing genotypes and virus conditions with Šidák`s post-test, mean  $\pm$  SEM, \*p<0.05. C: control virus, G: GCaMP6f virus. P: parvalbumin virus. **E-G.** Quantitative PCR of ER stress marker genes. PLNic and PLN p.Arg14del EHT after transduction with control-, GCaMP6f- or parvalbumin-virus; n= 6; each replicate consists of a pool of 2-3 EHTs. Two-way ANOVA (comparing genotypes and virus conditions) with Šidák`s post-test, mean  $\pm$  SEM , \*p<0.05.

# Appendix Figure S9

A

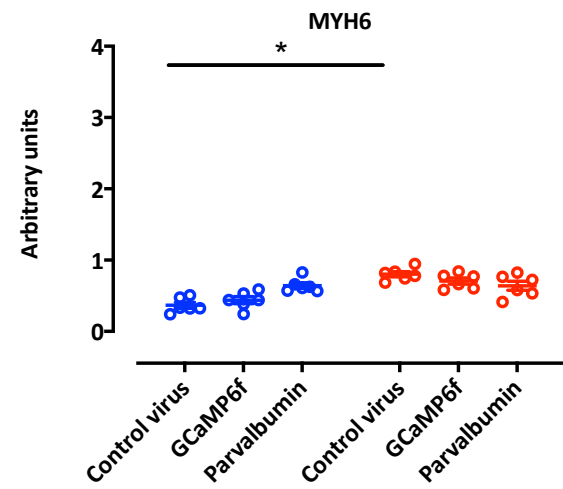

B

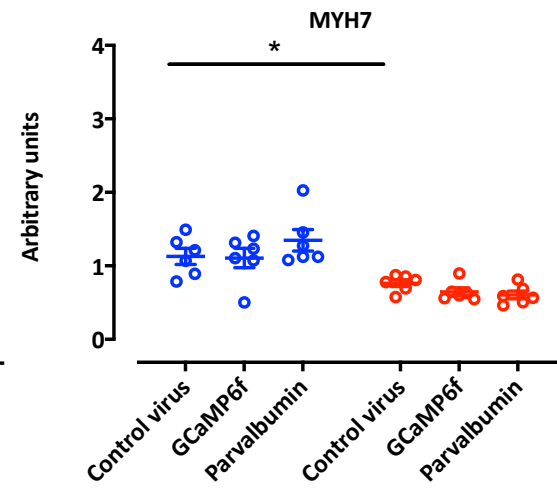

E

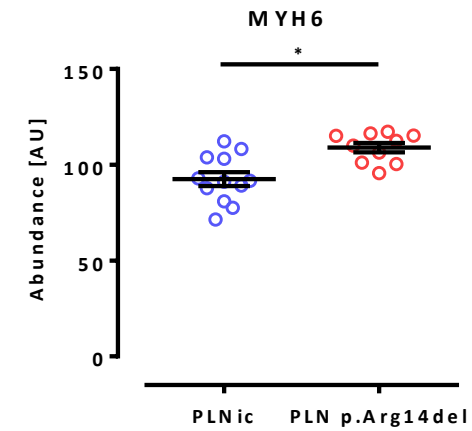

F

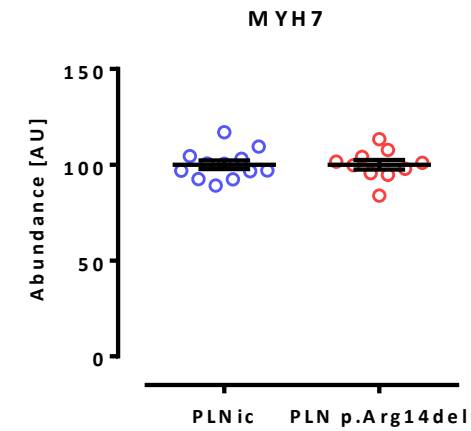

C

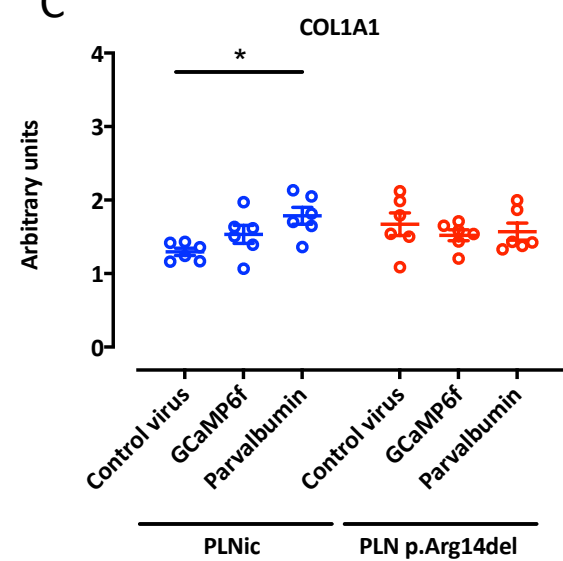

D

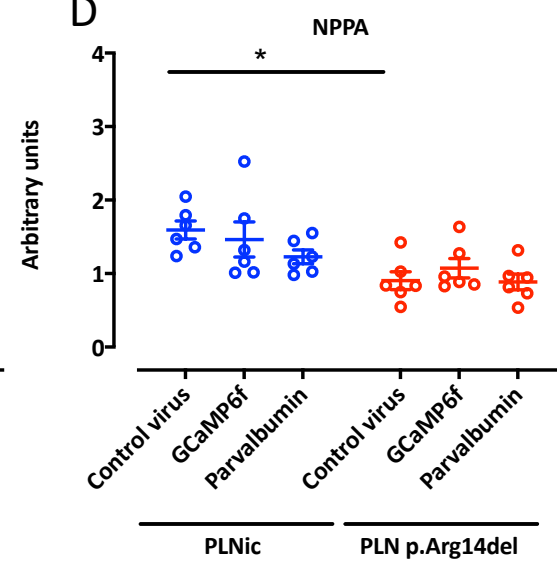

G

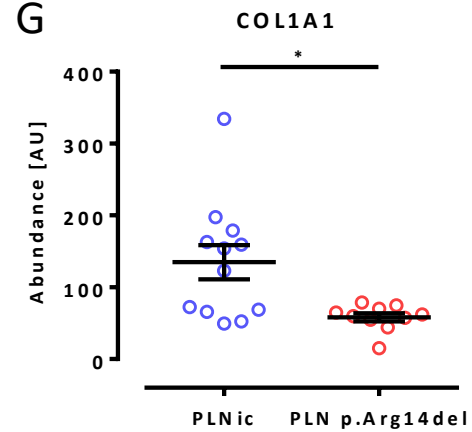

D

**Appendix Figure S9.** Fetal gene program markers. **A.** Quantitative PCR for *MYH6*, *MYH7*, *COL1A1* and *NPPA* of PLNic and PLN p.Arg14del EHTs after transduction with control-, GCaMP6f- or parvalbumin-virus; n= 6; each replicate consists of a pool of 2-3 EHTs. Two-way ANOVA (comparing genotypes and virus conditions) with Šidák's post-test, mean  $\pm$  SEM, \*p<0.05. **B.** Protein abundance of MYH6, MYH7 and COL1A1 in the proteomic screen, data extracted from **Table EV1**, PLNic: n=12, PLN p.Arg14del n=10, mean $\pm$ SEM, false discovery rate, \* p<0.05. NPPA not detected.

| Figure    | Sample                       | Replicate number          | p value                  | Statistical test                     |
|-----------|------------------------------|---------------------------|--------------------------|--------------------------------------|
| <b>2B</b> | NFH left ventricle           | 5                         | 0,0002                   | 1way ANOVA                           |
|           | PLNic, EHT                   | 8                         |                          |                                      |
|           | PLN p.Arg14del, EHT          | 8                         |                          |                                      |
| <b>2D</b> | PLNic, EHT, baseline         | 8                         | 0,0417                   | 2way ANOVA                           |
|           | PLNic, EHT, ISO              | 8                         | PM vs. PM + Iso          |                                      |
|           | PLN p.Arg14del, EHT baseline | 8                         |                          |                                      |
|           | PLN p.Arg14del, EHT, ISO     | 8                         |                          |                                      |
| <b>2E</b> | PLNic, EHT, baseline         | 27, 6 experiments         | < 0.0001                 | 1way ANOVA                           |
|           | PLNic, EHT, ISO              | 27, 6 experiments         |                          |                                      |
|           | PLN p.Arg14del, EHT baseline | 19, 6 experiments         | < 0.0001                 | 1way ANOVA                           |
|           | PLN p.Arg14del, EHT, ISO     | 19, 6 experiments         |                          |                                      |
| <b>2F</b> | PLNic, EHT, baseline         | 27, 6 experiments         | < 0.0001                 | 1way ANOVA                           |
|           | PLNic, EHT, ISO              | 27, 6 experiments         |                          |                                      |
|           | PLN p.Arg14del, EHT baseline | 19, 6 experiments         | < 0.0001                 | 1way ANOVA                           |
|           | PLN p.Arg14del, EHT, ISO     | 19, 6 experiments         |                          |                                      |
| <b>3A</b> | PLNic, EHT                   | 70, 10 experiments        | < 0.0001                 | Mann-Whitney U                       |
|           | PLN p.Arg14del, EHT          | 77, 10 experiments        |                          |                                      |
| <b>3B</b> | PLNic, EHT                   | 70, 10 experiments        | < 0.0001                 | Mann-Whitney U                       |
|           | PLN p.Arg14del, EHT          | 77, 10 experiments        |                          |                                      |
| <b>3C</b> | PLNic, EHT                   | 67, 9 experiments         | < 0.0001                 | Mann-Whitney U                       |
|           | PLN p.Arg14del, EHT          | 65, 9 experiments         |                          |                                      |
| <b>3D</b> | PLNic, EHT                   | 67, 9 experiments         | 0,0106                   | Mann-Whitney U                       |
|           | PLN p.Arg14del, EHT          | 65, 9 experiments         |                          |                                      |
| <b>3G</b> | PLNic, EHT                   | 21, 8 experiments         | < 0.0001                 | Unpaired two-sided Student's t-test  |
|           | PLN p.Arg14del, EHT          | 35, 8 experiments         |                          |                                      |
| <b>3H</b> | PLNic, EHT                   | 67, 9 experiments         | 0,1287                   | Unpaired two-sided Student's t-test  |
|           | PLN p.Arg14del, EHT          | 65, 9 experiments         |                          |                                      |
| <b>3I</b> | PLNic, EHT                   | 67, 9 experiments         | 0,1604                   | Unpaired two-sided Student's t-test  |
|           | PLN p.Arg14del, EHT          | 65, 9 experiments         |                          |                                      |
| <b>3J</b> | PLNic, EHT                   | 67, 9 experiments         | < 0.0001                 | Unpaired two-sided Student's t-test  |
|           | PLN p.Arg14del, EHT          | 65, 9 experiments         |                          |                                      |
| <b>4B</b> | PLNic, 2D hiPSC-CM           | 25, 2 experiments         | 0,6519                   | Mann-Whitney U                       |
|           | PLN p.Arg14del, 2D hiPSC-CM  | 24, 2 experiments         |                          |                                      |
| <b>4C</b> | PLNic, 2D hiPSC-CM           | 25, 2 experiments         | 0,8313                   | Mann-Whitney U                       |
|           | PLN p.Arg14del, 2D hiPSC-CM  | 24, 2 experiments         |                          |                                      |
| <b>4D</b> | PLNic, 2D hiPSC-CM           | 25, 2 experiments         | 0,0011                   | Mann-Whitney U                       |
|           | PLN p.Arg14del, 2D hiPSC-CM  | 24, 2 experiments         |                          |                                      |
| <b>4E</b> | PLNic, 2D hiPSC-CM           | 25, 2 experiments         | 0,0646                   | Mann-Whitney U                       |
|           | PLN p.Arg14del, 2D hiPSC-CM  | 24, 2 experiments         |                          |                                      |
| <b>4G</b> | PLNic, EHT                   | 24, 32, 41, 5 experiments | 0.6537 (interaction)     | 2way ANOVA, Tukey's post test        |
|           | PLN p.Arg14del, EHT          |                           | 0.0187 (row factor)      |                                      |
|           |                              |                           | < 0,0001 (column factor) |                                      |
| <b>5C</b> | PLNic, EHT                   | 12, 2 batches             | < 0.05                   | Benjamini-Hochberg, Multiple testing |
|           | PLN p.Arg14del, EHT          | 10, 1 batch               |                          |                                      |

| Figure    | Sample                             | Replicate number | p value                  | Statistical test              |
|-----------|------------------------------------|------------------|--------------------------|-------------------------------|
| <b>6B</b> | PLNic, 2D hiPSC-CM                 | 6                | 0,0022                   | Mann-Whitney U                |
|           | PLN p.Arg14del, 2D hiPSC-CM        | 6                |                          |                               |
| <b>6C</b> | PLNic, 2D hiPSC-CM                 | 6                | 0,0152                   | Mann-Whitney U                |
|           | PLN p.Arg14del, 2D hiPSC-CM        | 6                |                          |                               |
| <b>6D</b> | PLNic, 2D hiPSC-CM                 | 6                | 0,0022                   | Mann-Whitney U                |
|           | PLN p.Arg14del, 2D hiPSC-CM        | 6                |                          |                               |
| <b>6E</b> | PLNic, EHT                         | 8                | 0,0002                   | Mann-Whitney U                |
|           | PLN p.Arg14del, EHT                | 8                |                          |                               |
| <b>7B</b> | NFH                                | 3, 15            | < 0.0001                 | 1way ANOVA, Tukey's post test |
|           | FH ICM                             | 2, 10            |                          |                               |
|           | FH PLN CM                          | 3, 14            |                          |                               |
| <b>7C</b> | NFH                                | 3, 15            | < 0.0001                 | 1way ANOVA, Tukey's post test |
|           | FH ICM                             | 3, 15            |                          |                               |
|           | FH PLN CM                          | 3, 15            |                          |                               |
| <b>8A</b> | PLNic, EHT, control virus          | 6                | 0.0005 (interaction)     | 2way ANOVA, Sidak's post test |
|           | PLNic, EHT, GCaMP6f                | 6                | 0.0007 (row factor)      |                               |
|           | PLNic, EHT, parvalbumin            | 6                | 0.0001 (column factor)   |                               |
|           | PLN p.Arg14del, EHT, control virus | 6                |                          |                               |
|           | PLN p.Arg14del, EHT, GCaMP6f       | 6                |                          |                               |
|           | PLN p.Arg14del, EHT, parvalbumin   | 6                |                          |                               |
| <b>8C</b> | PLNic, EHT, control virus          | 9                | 0.6280 (interaction)     | 2way ANOVA, Sidak's post test |
|           | PLNic, EHT, GCaMP6f                | 9                | 0.0186 (row factor)      |                               |
|           | PLNic, EHT, parvalbumin            | 9                | < 0.0001 (column factor) |                               |
|           | PLN p.Arg14del, EHT, control virus | 9                |                          |                               |
|           | PLN p.Arg14del, EHT, GCaMP6f       | 9                |                          |                               |
|           | PLN p.Arg14del, EHT, parvalbumin   | 9                |                          |                               |
| <b>8E</b> | PLNic, EHT, control virus          | 24               | 0.0001 (interaction)     | 2way ANOVA, Sidak's post test |
|           | PLNic, EHT, GCaMP6f                | 23               | 0.0003 (row factor)      |                               |
|           | PLNic, EHT, parvalbumin            | 24               | < 0.0001 (column factor) |                               |
|           | PLN p.Arg14del, EHT, control virus | 22               |                          |                               |
|           | PLN p.Arg14del, EHT, GCaMP6f       | 24               |                          |                               |
|           | PLN p.Arg14del, EHT, parvalbumin   | 22               |                          |                               |
| <b>8F</b> | PLNic, EHT, control virus          | 6                | 0.0002 (interaction)     | 2way ANOVA, Sidak's post test |
|           | PLNic, EHT, GCaMP6f                | 6                | 0.0664 (row factor)      |                               |
|           | PLNic, EHT, parvalbumin            | 6                | 0.0010 (column factor)   |                               |
|           | PLN p.Arg14del, EHT, control virus | 6                |                          |                               |
|           | PLN p.Arg14del, EHT, GCaMP6f       | 6                |                          |                               |
|           | PLN p.Arg14del, EHT, parvalbumin   | 6                |                          |                               |
| <b>8G</b> | PLNic, EHT, control virus          | 6                | 0.0007 (interaction)     | 2way ANOVA, Sidak's post test |
|           | PLNic, EHT, GCaMP6f                | 6                | < 0.0001 (row factor)    |                               |
|           | PLNic, EHT, parvalbumin            | 6                | < 0.0001 (column factor) |                               |
|           | PLN p.Arg14del, EHT, control virus | 6                |                          |                               |
|           | PLN p.Arg14del, EHT, GCaMP6f       | 6                |                          |                               |
|           | PLN p.Arg14del, EHT, parvalbumin   | 6                |                          |                               |
| <b>8H</b> | PLNic, EHT, control virus          | 6                | 0.0693 (interaction)     | 2way ANOVA, Sidak's post test |
|           | PLNic, EHT, GCaMP6f                | 6                | 0.0387 (row factor)      |                               |
|           | PLNic, EHT, parvalbumin            | 6                | 0.8969 (column factor)   |                               |
|           | PLN p.Arg14del, EHT, control virus | 6                |                          |                               |
|           | PLN p.Arg14del, EHT, GCaMP6f       | 6                |                          |                               |
|           | PLN p.Arg14del, EHT, parvalbumin   | 6                |                          |                               |

| Figure    | Sample                             | Replicate number | p value                  | Statistical test              |
|-----------|------------------------------------|------------------|--------------------------|-------------------------------|
| <b>6B</b> | PLNic, 2D hiPSC-CM                 | 6                | 0,0022                   | Mann-Whitney U                |
|           | PLN p.Arg14del, 2D hiPSC-CM        | 6                |                          |                               |
| <b>6C</b> | PLNic, 2D hiPSC-CM                 | 6                | 0,0152                   | Mann-Whitney U                |
|           | PLN p.Arg14del, 2D hiPSC-CM        | 6                |                          |                               |
| <b>6D</b> | PLNic, 2D hiPSC-CM                 | 6                | 0,0022                   | Mann-Whitney U                |
|           | PLN p.Arg14del, 2D hiPSC-CM        | 6                |                          |                               |
| <b>6E</b> | PLNic, EHT                         | 8                | 0,0002                   | Mann-Whitney U                |
|           | PLN p.Arg14del, EHT                | 8                |                          |                               |
| <b>7B</b> | NFH                                | 3, 15            | < 0.0001                 | 1way ANOVA, Tukey's post test |
|           | FH ICM                             | 2, 10            |                          |                               |
|           | FH PLN CM                          | 3, 14            |                          |                               |
| <b>7C</b> | NFH                                | 3, 15            | < 0.0001                 | 1way ANOVA, Tukey's post test |
|           | FH ICM                             | 3, 15            |                          |                               |
|           | FH PLN CM                          | 3, 15            |                          |                               |
| <b>8A</b> | PLNic, EHT, control virus          | 6                | 0.0005 (interaction)     | 2way ANOVA, Sidak's post test |
|           | PLNic, EHT, GCaMP6f                | 6                | 0.0007 (row factor)      |                               |
|           | PLNic, EHT, parvalbumin            | 6                | 0.0001 (column factor)   |                               |
|           | PLN p.Arg14del, EHT, control virus | 6                |                          |                               |
|           | PLN p.Arg14del, EHT, GCaMP6f       | 6                |                          |                               |
|           | PLN p.Arg14del, EHT, parvalbumin   | 6                |                          |                               |
| <b>8C</b> | PLNic, EHT, control virus          | 9                | 0.6280 (interaction)     | 2way ANOVA, Sidak's post test |
|           | PLNic, EHT, GCaMP6f                | 9                | 0.0186 (row factor)      |                               |
|           | PLNic, EHT, parvalbumin            | 9                | < 0.0001 (column factor) |                               |
|           | PLN p.Arg14del, EHT, control virus | 9                |                          |                               |
|           | PLN p.Arg14del, EHT, GCaMP6f       | 9                |                          |                               |
|           | PLN p.Arg14del, EHT, parvalbumin   | 9                |                          |                               |
| <b>8E</b> | PLNic, EHT, control virus          | 24               | 0.0001 (interaction)     | 2way ANOVA, Sidak's post test |
|           | PLNic, EHT, GCaMP6f                | 23               | 0.0003 (row factor)      |                               |
|           | PLNic, EHT, parvalbumin            | 24               | < 0.0001 (column factor) |                               |
|           | PLN p.Arg14del, EHT, control virus | 22               |                          |                               |
|           | PLN p.Arg14del, EHT, GCaMP6f       | 24               |                          |                               |
|           | PLN p.Arg14del, EHT, parvalbumin   | 22               |                          |                               |
| <b>8F</b> | PLNic, EHT, control virus          | 6                | 0.0002 (interaction)     | 2way ANOVA, Sidak's post test |
|           | PLNic, EHT, GCaMP6f                | 6                | 0.0664 (row factor)      |                               |
|           | PLNic, EHT, parvalbumin            | 6                | 0.0010 (column factor)   |                               |
|           | PLN p.Arg14del, EHT, control virus | 6                |                          |                               |
|           | PLN p.Arg14del, EHT, GCaMP6f       | 6                |                          |                               |
|           | PLN p.Arg14del, EHT, parvalbumin   | 6                |                          |                               |
| <b>8G</b> | PLNic, EHT, control virus          | 6                | 0.0007 (interaction)     | 2way ANOVA, Sidak's post test |
|           | PLNic, EHT, GCaMP6f                | 6                | < 0.0001 (row factor)    |                               |
|           | PLNic, EHT, parvalbumin            | 6                | < 0.0001 (column factor) |                               |
|           | PLN p.Arg14del, EHT, control virus | 6                |                          |                               |
|           | PLN p.Arg14del, EHT, GCaMP6f       | 6                |                          |                               |
|           | PLN p.Arg14del, EHT, parvalbumin   | 6                |                          |                               |
| <b>8H</b> | PLNic, EHT, control virus          | 6                | 0.0693 (interaction)     | 2way ANOVA, Sidak's post test |
|           | PLNic, EHT, GCaMP6f                | 6                | 0.0387 (row factor)      |                               |
|           | PLNic, EHT, parvalbumin            | 6                | 0.8969 (column factor)   |                               |
|           | PLN p.Arg14del, EHT, control virus | 6                |                          |                               |
|           | PLN p.Arg14del, EHT, GCaMP6f       | 6                |                          |                               |
|           | PLN p.Arg14del, EHT, parvalbumin   | 6                |                          |                               |

| Figure                | Sample                                    | Replicate number  | p value                 | Statistical test                    |
|-----------------------|-------------------------------------------|-------------------|-------------------------|-------------------------------------|
| EV1B                  | PLN <sup>ic</sup> , EHT, pPDH             | 6                 | 0,0013                  | Unpaired two-sided Student's t-test |
|                       | PLN p.Arg14del, EHT, pPDH                 | 6                 |                         |                                     |
| EV1B                  | PLN <sup>ic</sup> , EHT, pAMPK            | 6                 | 0,0072                  | Unpaired two-sided Student's t-test |
|                       | PLN p.Arg14del, EHT, pAMPK                | 6                 |                         |                                     |
| EV1B                  | PLN <sup>ic</sup> , EHT, galectin-3       | 3                 | 0,0252                  | Unpaired two-sided Student's t-test |
|                       | PLN p.Arg14del, EHT, galectin-3           | 3                 |                         |                                     |
| EV1B                  | PLN <sup>ic</sup> , EHT, SLTM             | 3                 | 0,0006                  | Unpaired two-sided Student's t-test |
|                       | PLN p.Arg14del, EHT, SLTM                 | 3                 |                         |                                     |
| EV1B                  | PLN <sup>ic</sup> , EHT, LMCD1            | 3                 | 0,0006                  | Unpaired two-sided Student's t-test |
|                       | PLN p.Arg14del, EHT, LMCD1                | 3                 |                         |                                     |
| EV1B                  | PLN <sup>ic</sup> , EHT, calnexin         | 6                 | 0,0009                  | Unpaired two-sided Student's t-test |
|                       | PLN p.Arg14del, EHT, calnexin             | 6                 |                         |                                     |
| EV1B                  | PLN <sup>ic</sup> , EHT, reticulocalbin-3 | 3                 | 0,1592                  | Unpaired two-sided Student's t-test |
|                       | PLN p.Arg14del, EHT, reticulocalbin-3     | 3                 |                         |                                     |
|                       |                                           |                   |                         |                                     |
| Appendix Figure S2 C  | PLN <sup>ic</sup> , 2D hiPSC-CM           | 25, 2 experiments | 0,1158                  | Mann-Whitney U                      |
|                       | PLN p.Arg14del, 2D hiPSC-CM               | 24, 2 experiments |                         |                                     |
| Appendix Figure S2 D  | PLN <sup>ic</sup> , 2D hiPSC-CM           | 25, 2 experiments | 0,7249                  | Mann-Whitney U                      |
|                       | PLN p.Arg14del, 2D hiPSC-CM               | 24, 2 experiments |                         |                                     |
| Appendix Figure S2 E  | PLN <sup>ic</sup> , 2D hiPSC-CM           | 25, 2 experiments | 0,2926                  | Mann-Whitney U                      |
|                       | PLN p.Arg14del, 2D hiPSC-CM               | 24, 2 experiments |                         |                                     |
| Appendix Figure S2 F  | PLN <sup>ic</sup> , 2D hiPSC-CM           | 25, 2 experiments | 0,5632                  | Mann-Whitney U                      |
|                       | PLN p.Arg14del, 2D hiPSC-CM               | 24, 2 experiments |                         |                                     |
|                       |                                           |                   |                         |                                     |
| Appendix Figure S3B   | PLN <sup>ic</sup> , EHT                   | 5                 | 0,0159                  | Unpaired two-sided Student's t-test |
|                       | PLN p.Arg14del, EHT                       | 4                 |                         |                                     |
| Appendix Figure S3D-K | PLN <sup>ic</sup> , EHT                   | 12, 2 batches     | <0.05                   | Benjamini-Hochberg, Multiple testi  |
|                       | PLN p.Arg14del, EHT                       | 10, 1 batch       |                         |                                     |
|                       |                                           |                   |                         |                                     |
| Appendix Figure S5A   | PLN <sup>ic</sup> , hiPSC EBs             | 3-4/time point    | 2.04x10 <sup>-5</sup>   | Unpaired two-sided Student's t-test |
|                       | PLN p.Arg14del, hiPSC EBs                 | 3-4/time point    |                         |                                     |
| Appendix Figure S5B   | PLN <sup>ic</sup> , hiPSC EBs             | 3-4/time point    | 3.031x10 <sup>-4</sup>  | Unpaired two-sided Student's t-test |
|                       | PLN p.Arg14del, hiPSC EBs                 | 3-4/time point    |                         |                                     |
| Appendix Figure S5C   | PLN <sup>ic</sup> , hiPSC EBs             | 3-4/time point    | 3.574x10 <sup>-8</sup>  | Unpaired two-sided Student's t-test |
|                       | PLN p.Arg14del, hiPSC EBs                 | 3-4/time point    |                         |                                     |
| Appendix Figure S5D   | PLN <sup>ic</sup> , hiPSC EBs             | 3-4/time point    | 3.056x10 <sup>-6</sup>  | Unpaired two-sided Student's t-test |
|                       | PLN p.Arg14del, hiPSC EBs                 | 3-4/time point    |                         |                                     |
| Appendix Figure S5E   | PLN <sup>ic</sup> , hiPSC EBs             | 3-4/time point    | 6.007x10 <sup>-10</sup> | Unpaired two-sided Student's t-test |
|                       | PLN p.Arg14del, hiPSC EBs                 | 3-4/time point    |                         |                                     |
| Appendix Figure S5F   | PLN <sup>ic</sup> , hiPSC EBs             | 3-4/time point    | 1.999x10 <sup>-2</sup>  | Unpaired two-sided Student's t-test |
|                       | PLN p.Arg14del, hiPSC EBs                 | 3-4/time point    |                         |                                     |
| Appendix Figure S5G   | PLN <sup>ic</sup> , hiPSC EBs             | 3-4/time point    | 8.967x10 <sup>-1</sup>  | Unpaired two-sided Student's t-test |
|                       | PLN p.Arg14del, hiPSC EBs                 | 3-4/time point    |                         |                                     |
| Appendix Figure S5H   | PLN <sup>ic</sup> , hiPSC EBs             | 3-4/time point    | 2.607x10 <sup>-6</sup>  | Unpaired two-sided Student's t-test |
|                       | PLN p.Arg14del, hiPSC EBs                 | 3-4/time point    |                         |                                     |
| Appendix Figure S5I   | PLN <sup>ic</sup> , hiPSC EBs             | 3-4/time point    | 6.969x10 <sup>-1</sup>  | Unpaired two-sided Student's t-test |
|                       | PLN p.Arg14del, hiPSC EBs                 | 3-4/time point    |                         |                                     |

| Figure              | Sample              | Replicate number | p value                 | Statistical test                   |
|---------------------|---------------------|------------------|-------------------------|------------------------------------|
| Appendix Figure S6B | PLNic, EHT          | 19               | 0,8326                  | Mann-Whitney U                     |
|                     | PLN p.Arg14del, EHT | 21               |                         |                                    |
| Appendix Figure S6C | PLNic, EHT          | 19               | 0,9827                  | Mann-Whitney U                     |
|                     | PLN p.Arg14del, EHT | 21               |                         |                                    |
| Appendix Figure S6D | PLNic, EHT          | 19               | 0,1069                  | Mann-Whitney U                     |
|                     | PLN p.Arg14del, EHT | 21               |                         |                                    |
| Appendix Figure S6E | PLNic, EHT          | 19               | 0,8326                  | Mann-Whitney U                     |
|                     | PLN p.Arg14del, EHT | 21               |                         |                                    |
| Appendix Figure S6G | PLNic, EHT          | 19               | 0,004                   | Mann-Whitney U                     |
|                     | PLN p.Arg14del, EHT | 21               |                         |                                    |
| Appendix Figure S6H | PLNic, EHT          | 19               | 0,1849                  | Mann-Whitney U                     |
|                     | PLN p.Arg14del, EHT | 21               |                         |                                    |
| Appendix Figure S6I | PLNic, EHT          | 19               | 0,154                   | Mann-Whitney U                     |
|                     | PLN p.Arg14del, EHT | 21               |                         |                                    |
| Appendix Figure S6J | PLNic, EHT          | 19               | 0,0379                  | Mann-Whitney U                     |
|                     | PLN p.Arg14del, EHT | 21               |                         |                                    |
| Appendix Figure S8A | PLNic, EHT          | 6                | 0.8190 (interaction)    | 2way ANOVA, Sidak's post test      |
|                     | PLN p.Arg14del, EHT | 6                | 0.9350 (row factor)     |                                    |
| Appendix Figure S8C |                     |                  | 0.8009 (column factor)  |                                    |
|                     | PLNic, EHT          | 6                | 0.2136 (interaction)    | 2way ANOVA, Sidak's post test      |
|                     | PLN p.Arg14del, EHT | 6                | 0.8621 (row factor)     |                                    |
| Appendix Figure S8E |                     |                  | 0.3368 (column factor)  |                                    |
|                     | PLNic, EHT          | 6                | 0.1022 (interaction)    | 2way ANOVA, Sidak's post test      |
|                     | PLN p.Arg14del, EHT | 6                | 0.4141 (row factor)     |                                    |
| Appendix Figure S8F |                     |                  | 0.0168 (column factor)  |                                    |
|                     | PLNic, EHT          | 6                | 0.2124 (interaction)    | 2way ANOVA, Sidak's post test      |
|                     | PLN p.Arg14del, EHT | 6                | 0.3100 (row factor)     |                                    |
| Appendix Figure S8G |                     |                  | 0.0338 (column factor)  |                                    |
|                     | PLNic, EHT          | 6                | 0.3794 (interaction)    | 2way ANOVA, Sidak's post test      |
|                     | PLN p.Arg14del, EHT | 6                | 0.4426 (row factor)     |                                    |
| Appendix Figure S9A |                     |                  | 0.2064 (column factor)  |                                    |
|                     | PLNic, EHT          | 6                | 0.0002 (interaction)    | 2way ANOVA, Sidak's post test      |
|                     | PLN p.Arg14del, EHT | 6                | 0.2981 (row factor)     |                                    |
| Appendix Figure S9B |                     |                  | <0.0001 (column factor) |                                    |
|                     | PLNic, EHT          | 6                | 0.1527 (interaction)    | 2way ANOVA, Sidak's post test      |
|                     | PLN p.Arg14del, EHT | 6                | 0.5926 (row factor)     |                                    |
| Appendix Figure S9C |                     |                  | <0.0001 (column factor) |                                    |
|                     | PLNic, EHT          | 6                | 0.0374 (interaction)    | 2way ANOVA, Sidak's post test      |
|                     | PLN p.Arg14del, EHT | 6                | 0.1990 (row factor)     |                                    |
| Appendix Figure S9D |                     |                  | 0.5857 (column factor)  |                                    |
|                     | PLNic, EHT          | 6                | 0.4352 (interaction)    | 2way ANOVA, Sidak's post test      |
|                     | PLN p.Arg14del, EHT | 6                | 0.2850 (row factor)     |                                    |
| Appendix Figure S9E |                     |                  | 0.0003 (column factor)  |                                    |
|                     | PLNic, EHT          | 12, 2 batches    | <0.05                   | Benjamini-Hochberg, Multiple testi |
|                     | PLN p.Arg14del, EHT | 10, 1 batch      |                         |                                    |
| Appendix Figure S9F | PLNic, EHT          | 12, 2 batches    | <0.05                   | Benjamini-Hochberg, Multiple testi |
|                     | PLN p.Arg14del, EHT | 10, 1 batch      |                         |                                    |
| Appendix Figure S9G | PLNic, EHT          | 12, 2 batches    | <0.05                   | Benjamini-Hochberg, Multiple testi |
|                     | PLN p.Arg14del, EHT | 10, 1 batch      |                         |                                    |



## Appendix Figure S10. Statistical details
